# Supplementary material for: Persistent COVID-19 symptoms in a community study of 606,434 people in England
Source: PubMed Central journal article supplement (PMC9005552; doi:10.1038/s41467-022-29521-z), 2022-04-12
Supplement: 41467_2022_29521_MOESM1_ESM.pdf [file 41467_2022_29521_MOESM1_ESM.pdf]

# Persistent COVID-19 symptoms in a community study of 606,434 people in England: supplementary material

Whitaker M, Elliott J, Chadeau-Hyam et al, March 2022

## Table of Contents

|                                                                                                                                                          |    |
|----------------------------------------------------------------------------------------------------------------------------------------------------------|----|
| <i>Supplementary figures and tables</i> .....                                                                                                            | 3  |
| Table S1 Invitations and response rates.....                                                                                                             | 4  |
| Table S2 Prevalence of symptoms in rounds 3–5 and in round 6.....                                                                                        | 5  |
| Table S3 Prevalence of persistent symptoms among people with symptomatic infections. ....                                                                | 7  |
| Table S4 Numbers and weighted prevalence of currently or previously reported persistent symptoms in the full REACT-2 study population (rounds 3–5). .... | 13 |
| Table S5 Round 6 replication of symptom persistence people with symptomatic infections.....                                                              | 19 |
| Table S6 Round 6 replication of symptom persistence people with symptomatic infections (extended symptom list).....                                      | 22 |
| Table S7 Weighted prevalence of persistent symptoms in the population in round 6. ....                                                                   | 25 |
| Table S8 Weighted prevalence of persistent symptoms in the population in round 6 (extended symptom set).....                                             | 28 |
| Table S9 Odds ratios for persistent symptoms at 12 weeks among symptomatic respondents.....                                                              | 31 |
| Table S10 Characteristics of 12-week symptom clusters in rounds 3–5. ....                                                                                | 33 |
| Table S11 Summary of persistent symptom prevalence among LFIA-positive individuals. ....                                                                 | 36 |
| Table S12 Symptom prevalence in PCR-positive individuals in REACT-1.....                                                                                 | 37 |
| Figure S1 Modelled probability of symptomatic infection and persistent symptoms, by age. ....                                                            | 38 |
| Figure S2 Modelling of persistent symptoms as a function of biological and demographic variables (round 6 replication).....                              | 39 |
| Figure S3 Silhouette plot showing average silhouette width for 2 to 10 clusters. ....                                                                    | 40 |
| Figure S4 Pairwise co-occurrence heatmaps of symptoms at 12 weeks after symptom onset, by cluster.....                                                   | 41 |
| Figure S5 Visualisation of cluster separation and symptom contribution, using MCA.....                                                                   | 42 |
| Figure S6 Clustering results (round 6 replication). ....                                                                                                 | 43 |
| Figure S7 Logistic modelling of PCR-positivity as a function of symptoms experienced. ....                                                               | 44 |
| Figure S8 Modelling of persistent symptoms as a function of biological and demographic variables (using 15-symptom subset). ....                         | 45 |

|                                                                                                                                                                                                        |    |
|--------------------------------------------------------------------------------------------------------------------------------------------------------------------------------------------------------|----|
| Figure S9 Clustering results (with differing distance metrics).....                                                                                                                                    | 46 |
| Figure S13 Results of least absolute shrinkage and selection operator (LASSO) stability selection applied to predictors of persistent symptoms at 12 weeks among suspected or confirmed COVID-19. .... | 50 |
| Figure S14 Distribution of dates of self-reported COVID-19 illness.....                                                                                                                                | 51 |
| <i>Supplementary methods</i> .....                                                                                                                                                                     | 52 |
| Modelling approaches.....                                                                                                                                                                              | 52 |
| 1. Logistic regression .....                                                                                                                                                                           | 52 |
| 2. Variable ranking and selection.....                                                                                                                                                                 | 52 |
| Clustering: detailed methodology .....                                                                                                                                                                 | 53 |
| Latent Class Analysis (LCA) .....                                                                                                                                                                      | 54 |
| Replication analysis .....                                                                                                                                                                             | 55 |
| Table S13 Details of symptoms surveyed in rounds 3–5 and in round 6 of REACT-2.....                                                                                                                    | 55 |
| Survey (Rounds 3–5).....                                                                                                                                                                               | 56 |
| Survey (Round 6) .....                                                                                                                                                                                 | 57 |

## **Supplementary figures and tables**

### Table S1 Invitations and response rates.

Numbers invited, responders and non-responders, and percentages, by sex, age and Index of Multiple Deprivation (IMD) decile, and Chi-squared tests for heterogeneity, for REACT-2 (A) rounds 3–5 and (B) round 6.

#### A. Rounds 3–5

| Variable   | Category            | All invitees | Responders | Non-responders | Percent among responders | Percent among non-responders | $\chi^2$ p-value |
|------------|---------------------|--------------|------------|----------------|--------------------------|------------------------------|------------------|
| Sex        | Female              | 868186       | 284840     | 583346         | 56.0                     | 47.9                         | <0.001           |
|            | Male                | 857160       | 223861     | 633299         | 44.0                     | 52.1                         |                  |
| Age        | 18 to 24            | 167506       | 28655      | 138851         | 5.6                      | 11.4                         | <0.001           |
|            | 25 to 34            | 304439       | 65159      | 239280         | 12.8                     | 19.7                         |                  |
|            | 35 to 44            | 295640       | 85044      | 210596         | 16.7                     | 17.3                         |                  |
|            | 45 to 54            | 294439       | 103478     | 190961         | 20.3                     | 15.7                         |                  |
|            | 55 to 64            | 269967       | 105361     | 164606         | 20.7                     | 13.5                         |                  |
|            | 65 to 74            | 211651       | 85297      | 126354         | 16.8                     | 10.4                         |                  |
|            | 75 to 84            | 130143       | 31060      | 99083          | 6.1                      | 8.1                          |                  |
|            | 85+                 | 51561        | 4653       | 46908          | 0.9                      | 3.9                          |                  |
| IMD decile | 1 - most deprived   | 144116       | 21029      | 123087         | 4.1                      | 10.1                         | <0.001           |
|            | 2                   | 167351       | 29231      | 138120         | 5.7                      | 11.4                         |                  |
|            | 3                   | 177489       | 36633      | 140856         | 7.2                      | 11.6                         |                  |
|            | 4                   | 179709       | 44261      | 135448         | 8.7                      | 11.1                         |                  |
|            | 5                   | 179754       | 51325      | 128429         | 10.1                     | 10.6                         |                  |
|            | 6                   | 183552       | 58603      | 124949         | 11.5                     | 10.3                         |                  |
|            | 7                   | 175658       | 60891      | 114767         | 12.0                     | 9.4                          |                  |
|            | 8                   | 177277       | 65346      | 111931         | 12.8                     | 9.2                          |                  |
|            | 9                   | 173076       | 68386      | 104690         | 13.4                     | 8.6                          |                  |
|            | 10 - least deprived | 167407       | 73002      | 94405          | 14.4                     | 7.8                          |                  |

#### B. Round 6

| Variable   | Category            | All invitees | Responders | Non-responders | Percent among responders | Percent among non-responders | $\chi^2$ p-value |
|------------|---------------------|--------------|------------|----------------|--------------------------|------------------------------|------------------|
| Sex        | Female              | 193940       | 56871      | 137069         | 58.2                     | 47.7                         | <0.001           |
|            | Male                | 191048       | 40853      | 150195         | 41.8                     | 52.3                         |                  |
| Age        | 18 to 24            | 37102        | 4982       | 32120          | 5.1                      | 11.2                         | <0.001           |
|            | 25 to 34            | 67325        | 11791      | 55534          | 12.1                     | 19.3                         |                  |
|            | 35 to 44            | 66662        | 15417      | 51245          | 15.8                     | 17.8                         |                  |
|            | 45 to 54            | 65195        | 18980      | 46215          | 19.4                     | 16.1                         |                  |
|            | 55 to 64            | 60845        | 20760      | 40085          | 21.2                     | 14                           |                  |
|            | 65 to 74            | 47235        | 17770      | 29465          | 18.2                     | 10.3                         |                  |
|            | 75 to 84            | 29188        | 7014       | 22174          | 7.2                      | 7.7                          |                  |
|            | 85+                 | 11436        | 1013       | 10423          | 1                        | 3.6                          |                  |
| IMD decile | 1 - most deprived   | 28255        | 4088       | 24167          | 4.2                      | 12.7                         | <0.001           |
|            | 2                   | 32304        | 5597       | 26707          | 5.7                      | 14.1                         |                  |
|            | 3                   | 33332        | 7164       | 26168          | 7.3                      | 13.8                         |                  |
|            | 4                   | 31886        | 8683       | 23203          | 8.9                      | 12.2                         |                  |
|            | 5                   | 29960        | 9756       | 20204          | 10                       | 10.7                         |                  |
|            | 6                   | 29340        | 11233      | 18107          | 11.5                     | 9.6                          |                  |
|            | 7                   | 27147        | 11672      | 15475          | 11.9                     | 8.2                          |                  |
|            | 8                   | 26864        | 12498      | 14366          | 12.8                     | 7.6                          |                  |
|            | 9                   | 25395        | 13048      | 12347          | 13.4                     | 6.5                          |                  |
|            | 10 - least deprived | 22790        | 13988      | 8802           | 14.3                     | 4.6                          |                  |

**Table S2 Prevalence of symptoms in rounds 3–5 and in round 6**

The first 27 symptoms listed were surveyed in all rounds (asterisks indicate symptoms that were grouped in round 6). Chills and heavy arms/legs were surveyed in rounds 3–5 only, and the final 9 symptoms were surveyed in round 6 only.

| Variable                         | Main analysis<br>(Rounds 3–5, Sep 2020–Feb 2021) | Replication<br>(Round 6, May 2021) | Sum over all<br>rounds |
|----------------------------------|--------------------------------------------------|------------------------------------|------------------------|
| Appetite loss                    | 1942 (2.7%, [2.6-2.8])                           | 93 (1%, [0.8-1.2])                 | 2035                   |
| Nausea/vomiting*                 | 600 (0.8%, [0.8-0.9])                            | 158 (1.7%, [1.4-2])                | 758                    |
| Diarrhoea*                       | 983 (1.4%, [1.3-1.4])                            | 158 (1.7%, [1.4-2])                | 1141                   |
| Abdominal pain/belly ache*       | 1175 (1.6%, [1.5-1.7])                           | 158 (1.7%, [1.4-2])                | 1333                   |
| Runny nose**                     | 1882 (2.6%, [2.5-2.7])                           | 154 (1.6%, [1.4-1.9])              | 2036                   |
| Sneezing                         | 1512 (2.1%, [2-2.2])                             | 64 (0.7%, [0.5-0.9])               | 1576                   |
| Blocked nose**                   | 2102 (2.9%, [2.8-3])                             | 154 (1.6%, [1.4-1.9])              | 2256                   |
| Sore eyes                        | 2154 (3%, [2.8-3.1])                             | 117 (1.2%, [1-1.5])                | 2271                   |
| Loss or change to sense of smell | 3510 (4.8%, [4.7-5])                             | 404 (4.3%, [3.9-4.7])              | 3914                   |
| Loss or change to sense of taste | 2927 (4%, [3.9-4.2])                             | 364 (3.9%, [3.5-4.3])              | 3291                   |
| Sore throat***                   | 2212 (3%, [2.9-3.2])                             | 172 (1.8%, [1.6-2.1])              | 2384                   |
| Hoarse voice***                  | 1572 (2.2%, [2.1-2.3])                           | 172 (1.8%, [1.6-2.1])              | 1744                   |
| Headache                         | 3792 (5.2%, [5.1-5.4])                           | 311 (3.3%, [3-3.7])                | 4103                   |
| Dizziness                        | 2224 (3.1%, [2.9-3.2])                           | 244 (2.6%, [2.3-2.9])              | 2468                   |
| Shortness of breath              | 7166 (9.8%, [9.6-10.1])                          | 750 (7.9%, [7.4-8.5])              | 7916                   |
| New persistent cough             | 3073 (4.2%, [4.1-4.4])                           | 361 (3.8%, [3.5-4.2])              | 3434                   |
| Tight chest****                  | 4234 (5.8%, [5.7-6])                             | 398 (4.2%, [3.8-4.6])              | 4632                   |
| Chest pain****                   | 1854 (2.5%, [2.4-2.7])                           | 398 (4.2%, [3.8-4.6])              | 2252                   |
| Fever                            | 897 (1.2%, [1.2-1.3])                            | 55 (0.6%, [0.4-0.8])               | 952                    |
| Difficulty sleeping              | 5427 (7.5%, [7.3-7.7])                           | 438 (4.6%, [4.2-5.1])              | 5865                   |
| Tiredness                        | 12214 (16.8%, [16.5-17.1])                       | 759 (8%, [7.5-8.6])                | 12973                  |
| Severe fatigue                   | 2098 (2.9%, [2.8-3])                             | 234 (2.5%, [2.2-2.8])              | 2332                   |
| Numbness/tingling                | 1511 (2.1%, [2-2.2])                             | 202 (2.1%, [1.9-2.5])              | 1713                   |
| Muscle aches                     | 5264 (7.2%, [7-7.4])                             | 391 (4.1%, [3.8-4.6])              | 5655                   |
| Red, itchy areas on the skin     | 794 (1.1%, [1-1.2])                              | 179 (1.9%, [1.6-2.2])              | 973                    |
| Sudden swelling to face or lips  | 67 (0.1%, [0.1-0.1])                             | 10 (0.1%, [0.1-0.2])               | 77                     |
| Purple sores/blisters on feet    | 221 (0.3%, [0.3-0.3])                            | 34 (0.4%, [0.3-0.5])               | 255                    |
| Chills                           | 906 (1.2%, [1.2-1.3])                            | -                                  | 906                    |

|                                   |                        |                       |      |
|-----------------------------------|------------------------|-----------------------|------|
| Heavy arms/legs                   | 2331 (3.2%, [3.1-3.3]) | -                     | 2331 |
| Thrombosis                        |                        | 33 (0.3%, [0.2-0.5])  | 33   |
| Confusion/brain fog/forgetfulness |                        | 590 (6.2%, [5.8-6.8]) | 590  |
| Heart issues                      |                        | 287 (3%, [2.7-3.4])   | 287  |
| Pain in joints                    |                        | 450 (4.8%, [4.4-5.2]) | 450  |
| Weight loss                       |                        | 62 (0.7%, [0.5-0.8])  | 62   |
| Vision issues                     |                        | 182 (1.9%, [1.7-2.2]) | 182  |
| Hearing issues                    |                        | 196 (2.1%, [1.8-2.4]) | 196  |
| Hair loss                         |                        | 131 (1.4%, [1.2-1.6]) | 131  |

**Table S3 Prevalence of persistent symptoms among people with symptomatic infections.**

Numbers and prevalence of persistent symptoms in the full REACT-2 study population (rounds 3–5), among the 76,155 symptomatic participants for whom we have 12 weeks’ observation time and complete data. Table S2A shows prevalence of any of the 29 surveyed symptoms; Table S2B shows prevalence of any of a subset of 15 symptoms identified as predictive of PCR positivity. The final three columns show prevalence weighted to be representative of the adult population of England, by age, sex, ethnicity, lower-tier local authority population, and index of multiple deprivation (IMD).

(A) All 29 symptoms

| Variable                       | Category          | n     | Counts at 12 weeks                         |                                            |                                            | Prevalence at 12 weeks                      |                                             |                                                |
|--------------------------------|-------------------|-------|--------------------------------------------|--------------------------------------------|--------------------------------------------|---------------------------------------------|---------------------------------------------|------------------------------------------------|
|                                |                   |       | Number with 1 or more symptoms at 12 weeks | Number with 2 or more symptoms at 12 weeks | Number with 3 or more symptoms at 12 weeks | Prevalence 1 or more symptoms at 12 weeks % | Prevalence 2 or more symptoms at 12 weeks % | Prevalence of 3 or more symptoms at 12 weeks % |
| All participants               | All participants  | 76155 | 28713                                      | 17860                                      | 11241                                      | 37.7 (37.4,38.0)                            | 23.5 (23.2,23.8)                            | 14.8 (14.5,15.0)                               |
| Sex                            | Male              | 32500 | 10604                                      | 6248                                       | 3728                                       | 32.6 (32.1,33.1)                            | 19.2 (18.8,19.7)                            | 11.5 (11.1,11.8)                               |
|                                | Female            | 43654 | 18109                                      | 11612                                      | 7513                                       | 41.5 (41.0,41.9)                            | 26.6 (26.2,27.0)                            | 17.2 (16.9,17.6)                               |
| Age group                      | 18-24             | 5085  | 1534                                       | 885                                        | 514                                        | 30.2 (28.9,31.4)                            | 17.4 (16.4,18.5)                            | 10.1 (9.31,11.0)                               |
|                                | 25-34             | 12245 | 3784                                       | 2105                                       | 1219                                       | 30.9 (30.1,31.7)                            | 17.2 (16.5,17.9)                            | 9.96 (9.44,10.5)                               |
|                                | 35-44             | 15992 | 5232                                       | 3083                                       | 1815                                       | 32.7 (32.0,33.4)                            | 19.3 (18.7,19.9)                            | 11.3 (10.9,11.9)                               |
|                                | 45-54             | 17548 | 6858                                       | 4311                                       | 2732                                       | 39.1 (38.4,39.8)                            | 24.6 (23.9,25.2)                            | 15.6 (15.0,16.1)                               |
|                                | 55-64             | 15148 | 6461                                       | 4205                                       | 2713                                       | 42.7 (41.9,43.4)                            | 27.8 (27.1,28.5)                            | 17.9 (17.3,18.5)                               |
|                                | 65-74             | 7811  | 3615                                       | 2406                                       | 1629                                       | 46.3 (45.2,47.4)                            | 30.8 (29.8,31.8)                            | 20.9 (20.0,21.8)                               |
| Ethnicity                      | 74+               | 2326  | 1229                                       | 865                                        | 619                                        | 52.8 (50.8,54.9)                            | 37.2 (35.2,39.2)                            | 26.6 (24.9,28.4)                               |
|                                | Asian             | 2676  | 809                                        | 480                                        | 275                                        | 30.2 (28.5,32.0)                            | 17.9 (16.5,19.4)                            | 10.3 (9.18,11.5)                               |
|                                | Black             | 739   | 278                                        | 138                                        | 84                                         | 37.6 (34.2,41.2)                            | 18.7 (16.0,21.6)                            | 11.4 (9.28,13.9)                               |
|                                | Mixed             | 1244  | 487                                        | 310                                        | 202                                        | 39.1 (36.5,41.9)                            | 24.9 (22.6,27.4)                            | 16.2 (14.3,18.4)                               |
|                                | Other             | 793   | 299                                        | 180                                        | 118                                        | 37.7 (34.4,41.1)                            | 22.7 (19.9,25.7)                            | 14.9 (12.6,17.5)                               |
| Adiposity                      | White             | 70103 | 26603                                      | 16600                                      | 10461                                      | 37.9 (37.6,38.3)                            | 23.7 (23.4,24.0)                            | 14.9 (14.7,15.2)                               |
|                                | Underweight       | 886   | 333                                        | 220                                        | 147                                        | 37.6 (34.5,40.8)                            | 24.8 (22.1,27.8)                            | 16.6 (14.3,19.2)                               |
|                                | Normal weight     | 26128 | 8954                                       | 5325                                       | 3182                                       | 34.3 (33.7,34.8)                            | 20.4 (19.9,20.9)                            | 12.2 (11.8,12.6)                               |
|                                | Obese             | 23958 | 8916                                       | 5449                                       | 3398                                       | 37.2 (36.6,37.8)                            | 22.7 (22.2,23.3)                            | 14.2 (13.7,14.6)                               |
| Healthcare or care home worker | Overweight        | 16076 | 7107                                       | 4698                                       | 3127                                       | 44.2 (43.4,45.0)                            | 29.2 (28.5,29.9)                            | 19.5 (18.8,20.1)                               |
|                                | Yes               | 5243  | 2283                                       | 1469                                       | 920                                        | 43.5 (42.2,44.9)                            | 28.0 (26.8,29.2)                            | 17.5 (16.5,18.6)                               |
| Index of multiple deprivation  | 1 - most deprived | 8096  | 3445                                       | 2288                                       | 1535                                       | 42.6 (41.5,43.6)                            | 28.3 (27.3,29.3)                            | 19.0 (18.1,19.8)                               |

|                                         |                                                                  |       |       |       |       |                  |                  |                  |
|-----------------------------------------|------------------------------------------------------------------|-------|-------|-------|-------|------------------|------------------|------------------|
| deprivation (IMD)                       |                                                                  |       |       |       |       |                  |                  |                  |
| quintile                                |                                                                  |       |       |       |       |                  |                  |                  |
|                                         | 2                                                                | 12789 | 5066  | 3223  | 2118  | 39.6 (38.8,40.5) | 25.2 (24.5,26.0) | 16.6 (15.9,17.2) |
|                                         | 3                                                                | 16491 | 6336  | 3937  | 2500  | 38.4 (37.7,39.2) | 23.9 (23.2,24.5) | 15.2 (14.6,15.7) |
|                                         | 4                                                                | 18202 | 6728  | 4122  | 2553  | 37.0 (36.3,37.7) | 22.6 (22.0,23.3) | 14.0 (13.5,14.5) |
|                                         | 5 - least deprived                                               | 20577 | 7138  | 4290  | 2535  | 34.7 (34.0,35.3) | 20.8 (20.3,21.4) | 12.3 (11.9,12.8) |
| Current smoker                          | Current cigarette smoker                                         | 8441  | 3552  | 2367  | 1610  | 42.1 (41.0,43.1) | 28.0 (27.1,29.0) | 19.1 (18.2,19.9) |
|                                         | Not current cigarette smoker                                     | 67021 | 24916 | 15344 | 9533  | 37.2 (36.8,37.5) | 22.9 (22.6,23.2) | 14.2 (14.0,14.5) |
|                                         | Prefer not to say                                                | 693   | 245   | 149   | 98    | 35.4 (31.9,39.0) | 21.5 (18.6,24.7) | 14.1 (11.7,16.9) |
| Current vaper                           | Current vaper                                                    | 4933  | 1986  | 1273  | 834   | 40.3 (38.9,41.6) | 25.8 (24.6,27.0) | 16.9 (15.9,18.0) |
|                                         | Not current vaper                                                | 70802 | 26586 | 16493 | 10340 | 37.5 (37.2,37.9) | 23.3 (23.0,23.6) | 14.6 (14.3,14.9) |
|                                         | Prefer not to say                                                | 420   | 141   | 94    | 67    | 33.6 (29.2,38.2) | 22.4 (18.7,26.6) | 16.0 (12.8,19.8) |
| Severity of COVID-19 symptoms           | Mild symptoms                                                    | 21454 | 5441  | 2746  | 1351  | 25.4 (24.8,25.9) | 12.8 (12.4,13.3) | 6.30 (5.98,6.63) |
|                                         | Moderate symptoms                                                | 37976 | 14501 | 8841  | 5423  | 38.2 (37.7,38.7) | 23.3 (22.9,23.7) | 14.3 (13.9,14.6) |
|                                         | Severe symptoms                                                  | 16725 | 8771  | 6273  | 4467  | 52.4 (51.7,53.2) | 37.5 (36.8,38.2) | 26.7 (26.0,27.4) |
| Treatment sought/ received for COVID-19 | No medical attention sought                                      | 47642 | 15098 | 8544  | 4912  | 31.7 (31.3,32.1) | 17.9 (17.6,18.3) | 10.3 (10.0,10.6) |
|                                         | Sought medical attention from pharmacist / by phone (NHS 111/GP) | 17794 | 8717  | 5991  | 4120  | 49.0 (48.3,49.7) | 33.7 (33.0,34.4) | 23.2 (22.5,23.8) |
|                                         | Visited GP/walk-in centre/A&E                                    | 6154  | 2811  | 1911  | 1263  | 45.7 (44.4,46.9) | 31.1 (29.9,32.2) | 20.5 (19.5,21.6) |
|                                         | Hospital admission                                               | 629   | 408   | 319   | 241   | 64.9 (61.1,68.5) | 50.7 (46.8,54.6) | 38.3 (34.6,42.2) |
| Gross household income                  | 0-14,999                                                         | 4543  | 2316  | 1673  | 1209  | 51.0 (49.5,52.4) | 36.8 (35.4,38.2) | 26.6 (25.3,27.9) |
|                                         | 15,000-49,999                                                    | 21468 | 8746  | 5548  | 3521  | 40.7 (40.1,41.4) | 25.8 (25.3,26.4) | 16.4 (15.9,16.9) |
|                                         | 50,000-149,999                                                   | 21923 | 7100  | 4088  | 2325  | 32.4 (31.8,33.0) | 18.6 (18.1,19.2) | 10.6 (10.2,11.0) |
|                                         | >150,000                                                         | 3082  | 886   | 463   | 245   | 28.7 (27.2,30.4) | 15.0 (13.8,16.3) | 7.95 (7.05,8.96) |
| Health conditions                       | Organ transplant recipient                                       | 70    | 35    | 27    | 20    | 50.0 (38.6,61.4) | 38.6 (28.0,50.3) | 28.6 (19.3,40.1) |
|                                         | Diabetes (type I or II)                                          | 3282  | 1596  | 1118  | 837   | 48.6 (46.9,50.3) | 34.1 (32.5,35.7) | 25.5 (24.0,27.0) |



|                                 |       |      |      |      |                  |                  |                  |
|---------------------------------|-------|------|------|------|------------------|------------------|------------------|
| Heart disease or heart problems | 2822  | 1521 | 1090 | 816  | 53.9 (52.1,55.7) | 38.6 (36.8,40.4) | 28.9 (27.3,30.6) |
| Hypertension                    | 8269  | 4009 | 2744 | 1905 | 48.5 (47.4,49.6) | 33.2 (32.2,34.2) | 23.0 (22.1,24.0) |
| Stroke                          | 415   | 211  | 149  | 110  | 50.8 (46.0,55.6) | 35.9 (31.4,40.6) | 26.5 (22.5,31.0) |
| Kidney disease                  | 547   | 325  | 238  | 166  | 59.4 (55.2,63.5) | 43.5 (39.4,47.7) | 30.3 (26.6,34.3) |
| Liver disease                   | 309   | 171  | 123  | 103  | 55.3 (49.8,60.8) | 39.8 (34.5,45.4) | 33.3 (28.3,38.8) |
| Anaemia                         | 1371  | 801  | 586  | 439  | 58.4 (55.8,61.0) | 42.7 (40.1,45.4) | 32.0 (29.6,34.5) |
| Asthma                          | 9119  | 4419 | 3123 | 2192 | 48.5 (47.4,49.5) | 34.2 (33.3,35.2) | 24.0 (23.2,24.9) |
| Other lung condition            | 1639  | 1113 | 840  | 643  | 67.9 (65.6,70.1) | 51.3 (48.8,53.7) | 39.2 (36.9,41.6) |
| Cancer                          | 820   | 411  | 270  | 196  | 50.1 (46.7,53.5) | 32.9 (29.8,36.2) | 23.9 (21.1,26.9) |
| Neurological condition          | 686   | 378  | 295  | 229  | 55.1 (51.4,58.8) | 43.0 (39.3,46.7) | 33.4 (30.0,37.0) |
| Immunocompromised*              | 3080  | 1815 | 1400 | 1055 | 58.9 (57.2,60.7) | 45.5 (43.7,47.2) | 34.3 (32.6,35.9) |
| Depression                      | 6911  | 3931 | 2873 | 2146 | 56.9 (55.7,58.0) | 41.6 (40.4,42.7) | 31.1 (30.0,32.2) |
| Anxiety                         | 10516 | 5553 | 3923 | 2809 | 52.8 (51.9,53.8) | 37.3 (36.4,38.2) | 26.7 (25.9,27.6) |
| Psychiatric disorder (other)    | 641   | 372  | 284  | 226  | 58.0 (54.2,61.8) | 44.3 (40.5,48.2) | 35.3 (31.7,39.0) |

(B) 15 symptoms (loss or change of sense of smell, loss or change of sense of taste, tiredness, shortness of breath, heavy arms/legs, severe fatigue, dizziness, numbness/tingling, appetite loss, red, itchy areas on skin, difficulty sleeping, tight chest, headache, chest pain).

| Variable                                     | Category          | n     | Counts at 12 weeks                         |                                            |                                            | Prevalence at 12 weeks                      |                                             |                                                |
|----------------------------------------------|-------------------|-------|--------------------------------------------|--------------------------------------------|--------------------------------------------|---------------------------------------------|---------------------------------------------|------------------------------------------------|
|                                              |                   |       | Number with 1 or more symptoms at 12 weeks | Number with 2 or more symptoms at 12 weeks | Number with 3 or more symptoms at 12 weeks | Prevalence 1 or more symptoms at 12 weeks % | Prevalence 2 or more symptoms at 12 weeks % | Prevalence of 3 or more symptoms at 12 weeks % |
| All participants                             | All participants  | 76155 | 25052                                      | 14925                                      | 8663                                       | 32.9 (32.6,33.2)                            | 19.6 (19.3,19.9)                            | 11.4 (11.2,11.6)                               |
| Sex                                          | Male              | 32500 | 9027                                       | 5134                                       | 2842                                       | 27.8 (27.3,28.3)                            | 15.8 (15.4,16.2)                            | 8.74 (8.44,9.06)                               |
|                                              | Female            | 43654 | 16025                                      | 9791                                       | 5821                                       | 36.7 (36.3,37.2)                            | 22.4 (22.0,22.8)                            | 13.3 (13.0,13.7)                               |
| Age group                                    | 18-24             | 5085  | 1302                                       | 706                                        | 362                                        | 25.6 (24.4,26.8)                            | 13.9 (13.0,14.9)                            | 7.12 (6.44,7.86)                               |
|                                              | 25-34             | 12245 | 3230                                       | 1740                                       | 933                                        | 26.4 (25.6,27.2)                            | 14.2 (13.6,14.8)                            | 7.62 (7.16,8.10)                               |
|                                              | 35-44             | 15992 | 4586                                       | 2617                                       | 1409                                       | 28.7 (28.0,29.4)                            | 16.4 (15.8,16.9)                            | 8.81 (8.38,9.26)                               |
|                                              | 45-54             | 17548 | 6087                                       | 3733                                       | 2225                                       | 34.7 (34.0,35.4)                            | 21.3 (20.7,21.9)                            | 12.7 (12.2,13.2)                               |
|                                              | 55-64             | 15148 | 5658                                       | 3488                                       | 2099                                       | 37.4 (36.6,38.1)                            | 23.0 (22.4,23.7)                            | 13.9 (13.3,14.4)                               |
|                                              | 65-74             | 7811  | 3121                                       | 1942                                       | 1194                                       | 40.0 (38.9,41.0)                            | 24.9 (23.9,25.8)                            | 15.3 (14.5,16.1)                               |
|                                              | 74+               | 2326  | 1068                                       | 699                                        | 441                                        | 45.9 (43.9,47.9)                            | 30.1 (28.2,31.9)                            | 19.0 (17.4,20.6)                               |
| Ethnicity                                    | Asian             | 2676  | 692                                        | 395                                        | 217                                        | 25.9 (24.2,27.6)                            | 14.8 (13.5,16.2)                            | 8.11 (7.13,9.20)                               |
|                                              | Black             | 739   | 236                                        | 118                                        | 65                                         | 31.9 (28.7,35.4)                            | 16.0 (13.5,18.8)                            | 8.80 (6.96,11.1)                               |
|                                              | Mixed             | 1244  | 427                                        | 265                                        | 170                                        | 34.3 (31.7,37.0)                            | 21.3 (19.1,23.7)                            | 13.7 (11.9,15.7)                               |
|                                              | Other             | 793   | 254                                        | 142                                        | 92                                         | 32.0 (28.9,35.4)                            | 17.9 (15.4,20.7)                            | 11.6 (9.56,14.0)                               |
|                                              | White             | 70103 | 23233                                      | 13874                                      | 8038                                       | 33.1 (32.8,33.5)                            | 19.8 (19.5,20.1)                            | 11.5 (11.2,11.7)                               |
| Adiposity                                    | Underweight       | 886   | 295                                        | 183                                        | 122                                        | 33.3 (30.3,36.5)                            | 20.7 (18.1,23.4)                            | 13.8 (11.7,16.2)                               |
|                                              | Normal weight     | 26128 | 7706                                       | 4334                                       | 2371                                       | 29.5 (28.9,30.0)                            | 16.6 (16.1,17.0)                            | 9.07 (8.73,9.43)                               |
|                                              | Obese             | 23958 | 7726                                       | 4539                                       | 2629                                       | 32.2 (31.7,32.8)                            | 18.9 (18.5,19.4)                            | 11.0 (10.6,11.4)                               |
|                                              | Overweight        | 16076 | 6346                                       | 4038                                       | 2467                                       | 39.5 (38.7,40.2)                            | 25.1 (24.5,25.8)                            | 15.3 (14.8,15.9)                               |
| Healthcare or care home worker               | Yes               | 5243  | 2088                                       | 1298                                       | 764                                        | 39.8 (38.5,41.2)                            | 24.8 (23.6,25.9)                            | 14.6 (13.6,15.6)                               |
| Index of multiple deprivation (IMD) quintile | 1 - most deprived | 8096  | 3073                                       | 1955                                       | 1211                                       | 38.0 (36.9,39.0)                            | 24.1 (23.2,25.1)                            | 15.0 (14.2,15.8)                               |
|                                              | 2                 | 12789 | 4453                                       | 2699                                       | 1675                                       | 34.8 (34.0,35.6)                            | 21.1 (20.4,21.8)                            | 13.1 (12.5,13.7)                               |
|                                              | 3                 | 16491 | 5505                                       | 3324                                       | 1973                                       | 33.4 (32.7,34.1)                            | 20.2 (19.6,20.8)                            | 12.0 (11.5,12.5)                               |

|                                         |                                                                  |       |       |       |      |                  |                  |                  |
|-----------------------------------------|------------------------------------------------------------------|-------|-------|-------|------|------------------|------------------|------------------|
|                                         | 4                                                                | 18202 | 5858  | 3427  | 1926 | 32.2 (31.5,32.9) | 18.8 (18.3,19.4) | 10.6 (10.1,11.0) |
|                                         | 5 - least deprived                                               | 20577 | 6163  | 3520  | 1878 | 30.0 (29.3,30.6) | 17.1 (16.6,17.6) | 9.13 (8.74,9.53) |
| Current smoker                          | Current cigarette smoker                                         | 8441  | 3120  | 2011  | 1256 | 37.0 (35.9,38.0) | 23.8 (22.9,24.7) | 14.9 (14.1,15.7) |
|                                         | Not current cigarette smoker                                     | 67021 | 21715 | 12785 | 7329 | 32.4 (32.0,32.8) | 19.1 (18.8,19.4) | 10.9 (10.7,11.2) |
|                                         | Prefer not to say                                                | 693   | 217   | 129   | 78   | 31.3 (28.0,34.9) | 18.6 (15.9,21.7) | 11.3 (9.11,13.8) |
| Current vaper                           | Current vaper                                                    | 4933  | 1762  | 1085  | 655  | 35.7 (34.4,37.1) | 22.0 (20.9,23.2) | 13.3 (12.4,14.3) |
|                                         | Not current vaper                                                | 70802 | 23160 | 13757 | 7955 | 32.7 (32.4,33.1) | 19.4 (19.1,19.7) | 11.2 (11.0,11.5) |
|                                         | Prefer not to say                                                | 420   | 130   | 83    | 53   | 31.0 (26.7,35.5) | 19.8 (16.2,23.8) | 12.6 (9.78,16.1) |
| Severity of COVID-19 symptoms           | Mild symptoms                                                    | 21454 | 4378  | 2087  | 838  | 20.4 (19.9,21.0) | 9.73 (9.34,10.1) | 3.91 (3.65,4.17) |
|                                         | Moderate symptoms                                                | 37976 | 12626 | 7287  | 4114 | 33.2 (32.8,33.7) | 19.2 (18.8,19.6) | 10.8 (10.5,11.1) |
|                                         | Severe symptoms                                                  | 16725 | 8048  | 5551  | 3711 | 48.1 (47.4,48.9) | 33.2 (32.5,33.9) | 22.2 (21.6,22.8) |
| Treatment sought/ received for COVID-19 | No medical attention sought                                      | 47642 | 12864 | 6963  | 3571 | 27.0 (26.6,27.4) | 14.6 (14.3,14.9) | 7.50 (7.26,7.74) |
|                                         | Sought medical attention from pharmacist / by phone (NHS 111/GP) | 17794 | 7833  | 5161  | 3369 | 44.0 (43.3,44.8) | 29.0 (28.3,29.7) | 18.9 (18.4,19.5) |
|                                         | Visited GP/walk-in centre/A&E                                    | 6154  | 2477  | 1595  | 966  | 40.3 (39.0,41.5) | 25.9 (24.8,27.0) | 15.7 (14.8,16.6) |
|                                         | Hospital admission                                               | 629   | 393   | 293   | 209  | 62.5 (58.6,66.2) | 46.6 (42.7,50.5) | 33.2 (29.7,37.0) |
| Gross household income                  | 0-14,999                                                         | 4543  | 2079  | 1396  | 944  | 45.8 (44.3,47.2) | 30.7 (29.4,32.1) | 20.8 (19.6,22.0) |
|                                         | 15,000-49,999                                                    | 21468 | 7656  | 4665  | 2729 | 35.7 (35.0,36.3) | 21.7 (21.2,22.3) | 12.7 (12.3,13.2) |
|                                         | 50,000-149,999                                                   | 21923 | 6129  | 3389  | 1775 | 28.0 (27.4,28.6) | 15.5 (15.0,15.9) | 8.10 (7.74,8.46) |
|                                         | >150,000                                                         | 3082  | 757   | 387   | 183  | 24.6 (23.1,26.1) | 12.6 (11.4,13.8) | 5.94 (5.16,6.83) |
| Health conditions                       | Organ transplant recipient                                       | 70    | 30    | 23    | 16   | 42.9 (31.9,54.5) | 32.9 (23.0,44.5) | 22.9 (14.6,34.0) |
|                                         | Diabetes (type I or II)                                          | 3282  | 1425  | 965   | 664  | 43.4 (41.7,45.1) | 29.4 (27.9,31.0) | 20.2 (18.9,21.6) |
|                                         | Heart disease or heart problems                                  | 2822  | 1357  | 934   | 655  | 48.1 (46.2,49.9) | 33.1 (31.4,34.9) | 23.2 (21.7,24.8) |
|                                         | Hypertension                                                     | 8269  | 3555  | 2326  | 1485 | 43.0 (41.9,44.1) | 28.1 (27.2,29.1) | 18.0 (17.1,18.8) |
|                                         | Stroke                                                           | 415   | 191   | 132   | 97   | 46.0 (41.3,50.8) | 31.8 (27.5,36.4) | 23.4 (19.6,27.7) |

|                                 |       |      |      |      |                  |                  |                  |
|---------------------------------|-------|------|------|------|------------------|------------------|------------------|
| Kidney disease                  | 547   | 295  | 208  | 133  | 53.9 (49.7,58.1) | 38.0 (34.1,42.2) | 24.3 (20.9,28.1) |
| Liver disease                   | 309   | 153  | 110  | 81   | 49.5 (44.0,55.1) | 35.6 (30.5,41.1) | 26.2 (21.6,31.4) |
| Anaemia                         | 1371  | 737  | 522  | 370  | 53.8 (51.1,56.4) | 38.1 (35.5,40.7) | 27.0 (24.7,29.4) |
| Asthma                          | 9119  | 4042 | 2741 | 1775 | 44.3 (43.3,45.3) | 30.1 (29.1,31.0) | 19.5 (18.7,20.3) |
| Other lung condition            | 1639  | 1025 | 740  | 553  | 62.5 (60.2,64.8) | 45.1 (42.8,47.6) | 33.7 (31.5,36.1) |
| Cancer                          | 820   | 351  | 229  | 157  | 42.8 (39.5,46.2) | 27.9 (25.0,31.1) | 19.1 (16.6,22.0) |
| Neurological condition          | 686   | 351  | 271  | 203  | 51.2 (47.4,54.9) | 39.5 (35.9,43.2) | 29.6 (26.3,33.1) |
| Immunocompromised*              | 3080  | 1662 | 1235 | 882  | 54.0 (52.2,55.7) | 40.1 (38.4,41.8) | 28.6 (27.1,30.3) |
| Depression                      | 6911  | 3645 | 2546 | 1771 | 52.7 (51.6,53.9) | 36.8 (35.7,38.0) | 25.6 (24.6,26.7) |
| Anxiety                         | 10516 | 5096 | 3449 | 2275 | 48.5 (47.5,49.4) | 32.8 (31.9,33.7) | 21.6 (20.9,22.4) |
| Psychiatric disorder<br>(other) | 641   | 347  | 251  | 190  | 54.1 (50.3,58.0) | 39.2 (35.5,43.0) | 29.6 (26.2,33.3) |

**Table S4 Numbers and weighted prevalence of currently or previously reported persistent symptoms in the full REACT-2 study population (rounds 3–5).**

Table 1A shows prevalence of any of the 29 surveyed symptoms; Table 1B shows prevalence of any of a subset of 15 symptoms identified as predictive of PCR positivity. The final three columns show prevalence weighted to be representative of the adult population of England, by age, sex, ethnicity, lower-tier local authority population, and index of multiple deprivation (IMD).

(A) All 29 symptoms

| Variable                       | Category          | n      | Counts at 12 weeks             |                                |                                | Prevalence at 12 weeks                     |                                            |                                            |
|--------------------------------|-------------------|--------|--------------------------------|--------------------------------|--------------------------------|--------------------------------------------|--------------------------------------------|--------------------------------------------|
|                                |                   |        | Number with 1 or more symptoms | Number with 2 or more symptoms | Number with 3 or more symptoms | Prevalence 1 or more symptoms (weighted) % | Prevalence 2 or more symptoms (weighted) % | Prevalence 3 or more symptoms (weighted) % |
| All participants               |                   | 508707 | 28973                          | 17966                          | 11287                          | 5.80 (5.73,5.86)                           | 3.56 (3.51,3.61)                           | 2.23 (2.19,2.27)                           |
| Sex                            | Women             | 223861 | 10697                          | 6284                           | 3746                           | 4.94 (4.86,5.03)                           | 2.86 (2.80,2.93)                           | 1.69 (1.64,1.74)                           |
|                                | Men               | 284840 | 18276                          | 11682                          | 7541                           | 6.62 (6.52,6.71)                           | 4.23 (4.15,4.30)                           | 2.75 (2.68,2.81)                           |
| Age group                      | 18-24             | 28655  | 1535                           | 886                            | 514                            | 5.65 (5.46,5.85)                           | 3.19 (3.05,3.34)                           | 1.84 (1.73,1.95)                           |
|                                | 25-34             | 65159  | 3795                           | 2110                           | 1221                           | 6.05 (5.89,6.21)                           | 3.34 (3.22,3.46)                           | 1.88 (1.79,1.97)                           |
|                                | 35-44             | 85044  | 5276                           | 3106                           | 1824                           | 6.25 (6.08,6.42)                           | 3.65 (3.53,3.79)                           | 2.15 (2.05,2.25)                           |
|                                | 45-54             | 103478 | 6927                           | 4338                           | 2740                           | 6.86 (6.69,7.02)                           | 4.31 (4.18,4.45)                           | 2.73 (2.63,2.84)                           |
|                                | 55-64             | 105361 | 6536                           | 4235                           | 2731                           | 6.39 (6.22,6.56)                           | 4.19 (4.05,4.34)                           | 2.75 (2.64,2.87)                           |
|                                | 65-74             | 85297  | 3661                           | 2420                           | 1635                           | 4.61 (4.45,4.77)                           | 3.07 (2.94,3.20)                           | 2.09 (1.99,2.21)                           |
|                                | 74+               | 35713  | 1243                           | 871                            | 622                            | 3.68 (3.52,3.84)                           | 2.60 (2.47,2.73)                           | 1.92 (1.81,2.04)                           |
| Ethnicity                      | Asian             | 17666  | 823                            | 487                            | 279                            | 5.13 (4.91,5.36)                           | 2.83 (2.66,3.00)                           | 1.60 (1.48,1.73)                           |
|                                | Black             | 4091   | 285                            | 141                            | 86                             | 6.75 (6.33,7.18)                           | 3.53 (3.23,3.86)                           | 2.07 (1.84,2.32)                           |
|                                | Mixed             | 6112   | 490                            | 312                            | 202                            | 7.70 (7.04,8.42)                           | 4.73 (4.21,5.31)                           | 3.05 (2.63,3.53)                           |
|                                | Other             | 4434   | 306                            | 185                            | 121                            | 6.82 (6.18,7.51)                           | 4.17 (3.67,4.73)                           | 2.81 (2.41,3.28)                           |
|                                | White             | 472750 | 26826                          | 16688                          | 10497                          | 5.78 (5.71,5.85)                           | 3.59 (3.54,3.65)                           | 2.27 (2.22,2.31)                           |
| Adiposity                      | Underweight       | 6273   | 336                            | 220                            | 147                            | 5.93 (5.42,6.48)                           | 3.70 (3.30,4.14)                           | 2.14 (1.84,2.49)                           |
|                                | Normal weight     | 183305 | 9041                           | 5359                           | 3201                           | 5.08 (4.98,5.18)                           | 2.97 (2.90,3.05)                           | 1.76 (1.70,1.82)                           |
|                                | Obese             | 161456 | 8987                           | 5479                           | 3407                           | 5.76 (5.65,5.88)                           | 3.50 (3.41,3.59)                           | 2.19 (2.12,2.26)                           |
|                                | Overweight        | 97597  | 7177                           | 4725                           | 3136                           | 7.36 (7.19,7.52)                           | 4.72 (4.59,4.85)                           | 3.16 (3.05,3.27)                           |
| Healthcare or care home worker | Yes               | 27690  | 2311                           | 1483                           | 925                            | 8.55 (8.22,8.88)                           | 5.31 (5.05,5.58)                           | 3.22 (3.01,3.43)                           |
| Index of multiple deprivation  | 1 - most deprived | 50260  | 3477                           | 2299                           | 1538                           | 6.85 (6.70,7.01)                           | 4.41 (4.28,4.54)                           | 2.90 (2.80,3.01)                           |

|                                      |                                                                  |        |       |       |       |                  |                  |                  |
|--------------------------------------|------------------------------------------------------------------|--------|-------|-------|-------|------------------|------------------|------------------|
| deprivation (IMD) quintile           | 2                                                                | 80894  | 5116  | 3248  | 2129  | 6.28 (6.14,6.43) | 3.84 (3.72,3.95) | 2.48 (2.39,2.57) |
|                                      | 3                                                                | 109928 | 6390  | 3961  | 2512  | 5.59 (5.46,5.74) | 3.41 (3.30,3.52) | 2.11 (2.03,2.20) |
|                                      | 4                                                                | 126237 | 6792  | 4149  | 2563  | 5.28 (5.14,5.42) | 3.18 (3.07,3.29) | 1.93 (1.85,2.02) |
|                                      | 5 - least deprived                                               | 141388 | 7198  | 4309  | 2545  | 4.96 (4.83,5.10) | 2.96 (2.86,3.07) | 1.73 (1.65,1.81) |
| Current smoker                       | Current cigarette smoker                                         | 50983  | 3569  | 2372  | 1613  | 7.05 (6.84,7.26) | 4.60 (4.44,4.78) | 3.11 (2.97,3.26) |
|                                      | Not current cigarette smoker                                     | 453681 | 25154 | 15442 | 9573  | 5.63 (5.57,5.70) | 3.42 (3.37,3.47) | 2.12 (2.07,2.16) |
|                                      | Prefer not to say                                                | 4043   | 250   | 152   | 101   | 6.17 (5.50,6.91) | 4.04 (3.50,4.65) | 2.42 (2.01,2.91) |
| Current vaper                        | Current vaper                                                    | 28436  | 1997  | 1276  | 834   | 7.24 (6.95,7.53) | 4.59 (4.36,4.83) | 2.93 (2.75,3.13) |
|                                      | Not current vaper                                                | 477729 | 26834 | 16596 | 10386 | 5.70 (5.64,5.77) | 3.49 (3.44,3.54) | 2.18 (2.14,2.22) |
|                                      | Prefer not to say                                                | 2542   | 142   | 94    | 67    | 5.61 (4.83,6.51) | 3.95 (3.30,4.72) | 2.43 (1.92,3.05) |
| Severity of COVID symptoms           | Mild symptoms                                                    | 27572  | 5478  | 2757  | 1354  | 18.7 (18.3,19.1) | 9.29 (8.97,9.62) | 4.48 (4.25,4.71) |
|                                      | Moderate symptoms                                                | 45357  | 14618 | 8885  | 5440  | 31.4 (31.0,31.8) | 18.8 (18.5,19.2) | 11.6 (11.3,11.9) |
|                                      | Severe symptoms                                                  | 19187  | 8877  | 6324  | 4493  | 45.0 (44.3,45.7) | 32.1 (31.4,32.7) | 22.7 (22.2,23.3) |
| Treatment sought/ received for COVID | No medical attention sought                                      | 58330  | 15203 | 8585  | 4929  | 24.9 (24.5,25.2) | 13.9 (13.6,14.2) | 7.95 (7.74,8.17) |
|                                      | Sought medical attention from pharmacist / by phone (NHS 111/GP) | 21388  | 8809  | 6033  | 4140  | 39.6 (38.9,40.2) | 26.6 (26.1,27.2) | 18.4 (17.9,18.9) |
|                                      | Visited GP/walk-in centre/A&E                                    | 6792   | 2855  | 1930  | 1271  | 40.4 (39.2,41.6) | 27.9 (26.8,29.0) | 18.1 (17.2,19.0) |
|                                      | Hospital admission                                               | 739    | 413   | 320   | 242   | 53.9 (50.5,57.2) | 41.5 (38.2,44.8) | 31.1 (28.1,34.3) |
|                                      |                                                                  | 32819  | 2346  | 1685  | 1213  | 7.20 (6.94,7.46) | 5.09 (4.87,5.32) | 3.72 (3.53,3.91) |
| Gross household income               | 0-14,999                                                         | 148039 | 8819  | 5580  | 3536  | 6.11 (5.99,6.23) | 3.84 (3.75,3.94) | 2.39 (2.32,2.47) |
|                                      | 15,000-49,999                                                    | 128957 | 7156  | 4109  | 2334  | 5.69 (5.56,5.82) | 3.17 (3.07,3.27) | 1.78 (1.71,1.85) |
|                                      | 50,000-149,999                                                   | 16279  | 895   | 466   | 248   | 5.60 (5.23,5.99) | 2.73 (2.48,3.01) | 1.45 (1.27,1.66) |
|                                      |                                                                  | 596    | 36    | 27    | 20    | 5.71 (4.12,7.88) | 4.20 (2.86,6.13) | 3.53 (2.32,5.34) |
|                                      | >150,000                                                         | 27358  | 1617  | 1126  | 841   | 5.98 (5.71,6.26) | 4.06 (3.83,4.29) | 3.14 (2.94,3.35) |
| Comorbidities                        | Organ transplant recipient                                       | 21430  | 1535  | 1098  | 819   | 7.15 (6.82,7.50) | 5.13 (4.84,5.43) | 3.86 (3.61,4.13) |

|                                                                  |        |       |       |       |                  |                  |                  |
|------------------------------------------------------------------|--------|-------|-------|-------|------------------|------------------|------------------|
| Diabetes (type I or II)                                          | 65792  | 4048  | 2762  | 1915  | 6.22 (6.04,6.41) | 4.27 (4.12,4.43) | 3.03 (2.89,3.16) |
| Heart disease or heart problems                                  | 3352   | 214   | 149   | 110   | 6.23 (5.48,7.08) | 4.15 (3.53,4.86) | 3.14 (2.62,3.78) |
| Hypertension (high blood pressure)                               | 3867   | 326   | 239   | 166   | 8.40 (7.58,9.30) | 6.11 (5.40,6.90) | 4.11 (3.54,4.78) |
| Stroke                                                           | 2107   | 175   | 126   | 104   | 8.51 (7.41,9.75) | 5.81 (4.90,6.87) | 4.76 (3.94,5.73) |
| Kidney disease                                                   | 7575   | 807   | 588   | 439   | 11.1 (10.5,11.8) | 7.83 (7.28,8.42) | 5.78 (5.30,6.29) |
| Liver disease                                                    | 51337  | 4461  | 3137  | 2196  | 8.78 (8.54,9.03) | 6.09 (5.88,6.29) | 4.22 (4.06,4.40) |
| Anaemia                                                          | 12500  | 1122  | 842   | 643   | 9.07 (8.59,9.57) | 6.74 (6.32,7.18) | 5.32 (4.95,5.72) |
| Asthma                                                           | 8042   | 412   | 270   | 196   | 5.22 (4.74,5.73) | 3.49 (3.10,3.92) | 2.65 (2.32,3.03) |
| Other lung condition                                             | 5415   | 380   | 296   | 229   | 7.12 (6.47,7.84) | 5.38 (4.81,6.02) | 4.07 (3.58,4.63) |
| Cancer                                                           | 19302  | 1832  | 1407  | 1059  | 9.75 (9.33,10.2) | 7.51 (7.14,7.89) | 5.63 (5.30,5.97) |
| Condition affecting the brain and nerves                         | 38125  | 3966  | 2885  | 2151  | 10.4 (10.1,10.7) | 7.58 (7.33,7.84) | 5.59 (5.37,5.82) |
| A weakened immune system/reduced ability to deal with infections | 57140  | 5602  | 3948  | 2818  | 10.1 (9.87,10.3) | 7.08 (6.88,7.29) | 5.04 (4.86,5.21) |
| Depression                                                       | 3385   | 374   | 285   | 226   | 10.8 (9.90,11.8) | 8.11 (7.30,9.00) | 6.13 (5.42,6.92) |
| Anxiety                                                          | 508707 | 28973 | 17966 | 11287 | 4.95 (4.88,5.01) | 3.03 (2.98,3.08) | 1.93 (1.89,1.97) |
| Psychiatric disorder                                             | 223861 | 10697 | 6284  | 3746  | 17.8 (17.4,18.2) | 11.0 (10.7,11.4) | 6.57 (6.32,6.82) |

(B) 15 symptoms (loss or change of sense of smell, loss or change of sense of taste, tiredness, shortness of breath, heavy arms/legs, severe fatigue, dizziness, numbness/tingling, appetite loss, red, itchy areas on skin, difficulty sleeping, tight chest, headache, chest pain).

| Variable                                     | Category          | n      | Counts at 12 weeks             |                                |                                | Prevalence at 12 weeks                     |                                            |                                            |
|----------------------------------------------|-------------------|--------|--------------------------------|--------------------------------|--------------------------------|--------------------------------------------|--------------------------------------------|--------------------------------------------|
|                                              |                   |        | Number with 1 or more symptoms | Number with 2 or more symptoms | Number with 3 or more symptoms | Prevalence 1 or more symptoms (weighted) % | Prevalence 2 or more symptoms (weighted) % | Prevalence 3 or more symptoms (weighted) % |
| All participants                             |                   | 508707 | 25266                          | 14999                          | 8694                           | 5.03 (4.97,5.09)                           | 2.98 (2.93,3.02)                           | 1.71 (1.68,1.75)                           |
| Sex                                          | Women             | 223861 | 9103                           | 5162                           | 2856                           | 4.19 (4.11,4.27)                           | 2.36 (2.30,2.42)                           | 1.30 (1.25,1.34)                           |
|                                              | Men               | 284840 | 16163                          | 9837                           | 5838                           | 5.83 (5.74,5.93)                           | 3.57 (3.50,3.64)                           | 2.11 (2.06,2.17)                           |
| Age group                                    | 18-24             | 28655  | 1303                           | 707                            | 362                            | 4.67 (4.49,4.85)                           | 2.58 (2.45,2.71)                           | 1.35 (1.25,1.45)                           |
|                                              | 25-34             | 65159  | 3240                           | 1743                           | 933                            | 5.17 (5.02,5.31)                           | 2.75 (2.65,2.86)                           | 1.41 (1.33,1.49)                           |
|                                              | 35-44             | 85044  | 4622                           | 2632                           | 1416                           | 5.42 (5.27,5.58)                           | 3.12 (3.00,3.24)                           | 1.69 (1.60,1.78)                           |
|                                              | 45-54             | 103478 | 6144                           | 3754                           | 2230                           | 6.09 (5.94,6.25)                           | 3.72 (3.60,3.85)                           | 2.22 (2.13,2.32)                           |
|                                              | 55-64             | 105361 | 5715                           | 3511                           | 2109                           | 5.60 (5.44,5.76)                           | 3.48 (3.35,3.61)                           | 2.13 (2.03,2.24)                           |
|                                              | 65-74             | 85297  | 3161                           | 1950                           | 1200                           | 3.99 (3.84,4.14)                           | 2.49 (2.37,2.61)                           | 1.55 (1.46,1.65)                           |
|                                              | 74+               | 35713  | 1081                           | 702                            | 444                            | 3.25 (3.11,3.41)                           | 2.16 (2.04,2.28)                           | 1.39 (1.29,1.49)                           |
| Ethnicity                                    | Asian             | 17666  | 704                            | 401                            | 220                            | 4.24 (4.04,4.46)                           | 2.38 (2.23,2.54)                           | 1.26 (1.15,1.38)                           |
|                                              | Black             | 4091   | 243                            | 120                            | 66                             | 5.61 (5.23,6.02)                           | 3.00 (2.72,3.30)                           | 1.63 (1.43,1.86)                           |
|                                              | Mixed             | 6112   | 429                            | 266                            | 170                            | 6.67 (6.05,7.35)                           | 3.90 (3.43,4.44)                           | 2.36 (2.00,2.79)                           |
|                                              | Other             | 4434   | 260                            | 147                            | 94                             | 5.78 (5.20,6.43)                           | 3.28 (2.84,3.78)                           | 2.16 (1.81,2.58)                           |
|                                              | White             | 472750 | 23415                          | 13933                          | 8062                           | 5.04 (4.97,5.10)                           | 3.00 (2.95,3.05)                           | 1.74 (1.70,1.78)                           |
| ADIPOSITY                                    | Underweight       | 6273   | 298                            | 183                            | 122                            | 5.07 (4.60,5.59)                           | 3.00 (2.64,3.40)                           | 1.69 (1.42,2.00)                           |
|                                              | Normal weight     | 183305 | 7784                           | 4359                           | 2385                           | 4.38 (4.29,4.47)                           | 2.44 (2.37,2.51)                           | 1.32 (1.27,1.38)                           |
|                                              | Overweight        | 161456 | 7783                           | 4563                           | 2637                           | 4.95 (4.85,5.06)                           | 2.93 (2.84,3.01)                           | 1.69 (1.63,1.76)                           |
|                                              | Obese             | 97597  | 6399                           | 4054                           | 2473                           | 6.51 (6.35,6.67)                           | 4.05 (3.93,4.18)                           | 2.48 (2.38,2.58)                           |
| Healthcare or care home worker               | Yes               | 27690  | 2114                           | 1308                           | 768                            | 7.58 (7.27,7.90)                           | 4.70 (4.46,4.96)                           | 2.66 (2.47,2.86)                           |
| Index of multiple deprivation (IMD) quintile | 1 - most deprived | 50260  | 3098                           | 1962                           | 1213                           | 6.00 (5.85,6.15)                           | 3.75 (3.64,3.87)                           | 2.28 (2.19,2.37)                           |
|                                              | 2                 | 80894  | 4492                           | 2715                           | 1684                           | 5.51 (5.37,5.65)                           | 3.21 (3.11,3.32)                           | 1.92 (1.84,2.01)                           |
|                                              | 3                 | 109928 | 5553                           | 3340                           | 1978                           | 4.80 (4.68,4.93)                           | 2.87 (2.77,2.97)                           | 1.65 (1.58,1.73)                           |
|                                              | 4                 | 126237 | 5910                           | 3444                           | 1935                           | 4.55 (4.43,4.68)                           | 2.62 (2.53,2.73)                           | 1.44 (1.37,1.52)                           |



|                                      |                                                                  |        |       |       |      |                  |                  |                   |
|--------------------------------------|------------------------------------------------------------------|--------|-------|-------|------|------------------|------------------|-------------------|
|                                      | 5 - least deprived                                               | 141388 | 6213  | 3538  | 1884 | 4.28 (4.15,4.41) | 2.42 (2.33,2.52) | 1.28 (1.21,1.35)  |
| Current smoker                       | Current cigarette smoker                                         | 50983  | 3132  | 2015  | 1258 | 6.16 (5.97,6.36) | 3.87 (3.72,4.04) | 2.41 (2.29,2.54)  |
|                                      | Not current cigarette smoker                                     | 453681 | 21912 | 12853 | 7356 | 4.88 (4.82,4.94) | 2.86 (2.81,2.90) | 1.62 (1.59,1.66)  |
|                                      | Prefer not to say                                                | 4043   | 222   | 131   | 80   | 5.57 (4.94,6.28) | 3.53 (3.03,4.11) | 1.91 (1.55,2.35)  |
| Current vaper                        | Current vaper                                                    | 28436  | 1769  | 1086  | 655  | 6.39 (6.13,6.67) | 3.98 (3.77,4.20) | 2.27 (2.11,2.44)  |
|                                      | Not current vaper                                                | 477729 | 23366 | 13830 | 7986 | 4.94 (4.88,5.00) | 2.91 (2.86,2.96) | 1.68 (1.64,1.72)  |
|                                      | Prefer not to say                                                | 2542   | 131   | 83    | 53   | 5.23 (4.48,6.11) | 3.33 (2.73,4.05) | 1.77 (1.35,2.32)  |
| Severity of COVID symptoms           | Mild symptoms                                                    | 27572  | 4407  | 2094  | 840  | 14.9 (14.6,15.4) | 7.03 (6.75,7.32) | 2.79 (2.61,2.98)  |
|                                      | Moderate symptoms                                                | 45357  | 12718 | 7314  | 4126 | 27.1 (26.7,27.5) | 15.5 (15.2,15.9) | 8.85 (8.59,9.10)  |
|                                      | Severe symptoms                                                  | 19187  | 8141  | 5591  | 3728 | 41.2 (40.5,41.9) | 28.5 (27.9,29.1) | 18.6 (18.1,19.2)  |
| Treatment sought/ received for COVID | No medical attention sought                                      | 58330  | 12950 | 6992  | 3584 | 21.0 (20.7,21.4) | 11.3 (11.0,11.5) | 5.82 (5.63,6.00)  |
|                                      | Sought medical attention from pharmacist / by phone (NHS 111/GP) | 21388  | 7910  | 5192  | 3381 | 35.4 (34.8,36.0) | 23.0 (22.5,23.6) | 14.9 (14.5,15.4)  |
|                                      | Visited GP/walk-in centre/A&E                                    | 6792   | 2512  | 1607  | 971  | 35.6 (34.5,36.8) | 23.4 (22.4,24.4) | 13.5 (12.7,14.3)  |
|                                      | Hospital admission                                               | 739    | 397   | 294   | 210  | 51.6 (48.2,55.0) | 38.5 (35.3,41.8) | 27.2 (24.3,30.3)  |
| Gross household income               | 0-14,999                                                         | 32819  | 2102  | 1406  | 948  | 6.38 (6.13,6.63) | 4.22 (4.02,4.43) | 2.90 (2.74,3.08)  |
|                                      | 15,000-49,999                                                    | 148039 | 7720  | 4687  | 2738 | 5.34 (5.23,5.46) | 3.24 (3.15,3.33) | 1.87 (1.80,1.94)  |
|                                      | 50,000-149,999                                                   | 128957 | 6179  | 3405  | 1781 | 4.88 (4.76,5.00) | 2.64 (2.55,2.73) | 1.35 (1.29,1.41)  |
|                                      | >150,000                                                         | 16279  | 766   | 389   | 184  | 4.73 (4.39,5.09) | 2.29 (2.06,2.55) | 1.03 (0.878,1.21) |
| Comorbidities                        | Organ transplant recipient                                       | 596    | 31    | 23    | 16   | 4.55 (3.14,6.53) | 3.70 (2.45,5.53) | 2.86 (1.79,4.53)  |
|                                      | Diabetes (type I or II)                                          | 27358  | 1443  | 970   | 668  | 5.29 (5.04,5.56) | 3.52 (3.31,3.74) | 2.54 (2.36,2.73)  |
|                                      | Heart disease or heart problems                                  | 21430  | 1370  | 936   | 656  | 6.45 (6.13,6.79) | 4.35 (4.09,4.63) | 3.03 (2.81,3.27)  |
|                                      | Hypertension (high)                                              | 65792  | 3589  | 2337  | 1489 | 5.55 (5.37,5.73) | 3.66 (3.52,3.81) | 2.40 (2.28,2.52)  |

|                                                                  |       |      |      |      |                  |                  |                  |
|------------------------------------------------------------------|-------|------|------|------|------------------|------------------|------------------|
| blood pressure)                                                  |       |      |      |      |                  |                  |                  |
| Stroke                                                           | 3352  | 194  | 132  | 97   | 5.66 (4.94,6.48) | 3.60 (3.03,4.27) | 2.75 (2.25,3.34) |
| Kidney disease                                                   | 3867  | 296  | 208  | 133  | 7.80 (7.00,8.67) | 5.00 (4.36,5.72) | 3.31 (2.79,3.91) |
| Liver disease                                                    | 2107  | 157  | 111  | 82   | 7.73 (6.68,8.92) | 4.98 (4.15,5.98) | 3.61 (2.91,4.48) |
| Anaemia                                                          | 7575  | 741  | 522  | 370  | 10.1 (9.46,10.7) | 6.80 (6.29,7.35) | 4.76 (4.33,5.23) |
| Asthma                                                           | 51337 | 4075 | 2748 | 1777 | 7.94 (7.71,8.17) | 5.31 (5.12,5.51) | 3.38 (3.23,3.54) |
| Other lung condition                                             | 12500 | 1032 | 741  | 553  | 8.34 (7.88,8.83) | 5.97 (5.58,6.39) | 4.56 (4.22,4.94) |
| Cancer                                                           | 8042  | 352  | 229  | 157  | 4.50 (4.06,4.98) | 2.93 (2.58,3.33) | 2.19 (1.89,2.54) |
| Condition affecting the brain and nerves                         | 5415  | 352  | 271  | 203  | 6.59 (5.96,7.28) | 4.94 (4.39,5.55) | 3.59 (3.13,4.12) |
| A weakened immune system/reduced ability to deal with infections | 19302 | 1675 | 1240 | 884  | 8.95 (8.55,9.37) | 6.70 (6.34,7.06) | 4.68 (4.38,4.99) |
| Depression                                                       | 38125 | 3673 | 2554 | 1773 | 9.63 (9.35,9.91) | 6.77 (6.53,7.02) | 4.62 (4.42,4.82) |
| Anxiety                                                          | 57140 | 5137 | 3464 | 2281 | 9.22 (9.00,9.46) | 6.25 (6.06,6.44) | 4.06 (3.91,4.22) |
| Psychiatric disorder                                             | 3385  | 349  | 252  | 190  | 9.91 (9.02,10.9) | 6.94 (6.19,7.78) | 5.24 (4.58,5.98) |

**Table S5 Round 6 replication of symptom persistence people with symptomatic infections.**

Numbers and proportions of participants who reported one or more symptoms (from a list of 27\* symptoms surveyed in all four rounds) of COVID-19 at 12 weeks post symptom onset, among the 13,170 symptomatic participants from REACT-2 round 6 for whom we have 12 weeks' observation time and complete data.

| Variable                                     | Category          | n     | Counts at 12 weeks             |                                |                                | Prevalence at 12 weeks                     |                                            |                                            |
|----------------------------------------------|-------------------|-------|--------------------------------|--------------------------------|--------------------------------|--------------------------------------------|--------------------------------------------|--------------------------------------------|
|                                              |                   |       | Number with 1 or more symptoms | Number with 2 or more symptoms | Number with 3 or more symptoms | Prevalence 1 or more symptoms (unweighted) | Prevalence 2 or more symptoms (unweighted) | Prevalence 3 or more symptoms (unweighted) |
| All participants                             | All participants  | 13170 | 2845                           | 2188                           | 1572                           | 21.6 (20.9,22.3)                           | 16.6 (16.0,17.3)                           | 11.9 (11.4,12.5)                           |
| Sex                                          | Male              | 5100  | 892                            | 665                            | 452                            | 17.5 (16.5,18.6)                           | 13.0 (12.1,14.0)                           | 8.86 (8.11,9.67)                           |
|                                              | Female            | 8069  | 1953                           | 1523                           | 1120                           | 24.2 (23.3,25.2)                           | 18.9 (18.0,19.7)                           | 13.9 (13.1,14.7)                           |
| Age group                                    | 18-24             | 968   | 110                            | 80                             | 53                             | 11.4 (9.52,13.5)                           | 8.26 (6.69,10.2)                           | 5.48 (4.21,7.09)                           |
|                                              | 25-34             | 2266  | 348                            | 248                            | 153                            | 15.4 (13.9,16.9)                           | 10.9 (9.72,12.3)                           | 6.75 (5.79,7.86)                           |
|                                              | 35-44             | 2818  | 508                            | 391                            | 268                            | 18.0 (16.7,19.5)                           | 13.9 (12.6,15.2)                           | 9.51 (8.48,10.6)                           |
|                                              | 45-54             | 3022  | 719                            | 548                            | 401                            | 23.8 (22.3,25.3)                           | 18.1 (16.8,19.5)                           | 13.3 (12.1,14.5)                           |
|                                              | 55-64             | 2520  | 724                            | 571                            | 420                            | 28.7 (27.0,30.5)                           | 22.7 (21.1,24.3)                           | 16.7 (15.3,18.2)                           |
|                                              | 65-74             | 1197  | 321                            | 257                            | 201                            | 26.8 (24.4,29.4)                           | 21.5 (19.2,23.9)                           | 16.8 (14.8,19.0)                           |
| Ethnicity                                    | 74+               | 379   | 115                            | 93                             | 76                             | 30.3 (25.9,35.1)                           | 24.5 (20.5,29.1)                           | 20.1 (16.3,24.4)                           |
|                                              | Asian             | 590   | 88                             | 61                             | 47                             | 14.9 (12.3,18.0)                           | 10.3 (8.13,13.1)                           | 7.97 (6.04,10.4)                           |
|                                              | Black             | 204   | 43                             | 33                             | 24                             | 21.1 (16.0,27.2)                           | 16.2 (11.8,21.8)                           | 11.8 (8.03,16.9)                           |
|                                              | Mixed             | 245   | 50                             | 35                             | 29                             | 20.4 (15.8,25.9)                           | 14.3 (10.5,19.2)                           | 11.8 (8.37,16.5)                           |
|                                              | Other             | 173   | 39                             | 26                             | 18                             | 22.5 (17.0,29.3)                           | 15.0 (10.5,21.1)                           | 10.4 (6.68,15.8)                           |
| Adiposity                                    | White             | 11836 | 2593                           | 2006                           | 1432                           | 21.9 (21.2,22.7)                           | 16.9 (16.3,17.6)                           | 12.1 (11.5,12.7)                           |
|                                              | Underweight       | 163   | 36                             | 23                             | 14                             | 22.1 (16.4,29.1)                           | 14.1 (9.59,20.3)                           | 8.59 (5.19,13.9)                           |
|                                              | Normal weight     | 4511  | 822                            | 597                            | 411                            | 18.2 (17.1,19.4)                           | 13.2 (12.3,14.3)                           | 9.11 (8.31,9.99)                           |
|                                              | Overweight        | 4028  | 816                            | 634                            | 433                            | 20.3 (19.0,21.5)                           | 15.7 (14.6,16.9)                           | 10.7 (9.83,11.7)                           |
| Healthcare or care home worker               | Obese             | 2816  | 802                            | 652                            | 493                            | 28.5 (26.8,30.2)                           | 23.2 (21.6,24.7)                           | 17.5 (16.1,19.0)                           |
|                                              | Yes               | 1342  | 366                            | 278                            | 193                            | 27.3 (25.0,29.7)                           | 20.7 (18.6,23.0)                           | 14.4 (12.6,16.4)                           |
| Index of multiple deprivation (IMD) quintile | 1 - most deprived | 1480  | 344                            | 280                            | 214                            | 23.2 (21.2,25.5)                           | 18.9 (17.0,21.0)                           | 14.5 (12.8,16.3)                           |
|                                              | 2                 | 2374  | 521                            | 405                            | 281                            | 21.9 (20.3,23.7)                           | 17.1 (15.6,18.6)                           | 11.8 (10.6,13.2)                           |
|                                              | 3                 | 2763  | 611                            | 472                            | 344                            | 22.1 (20.6,23.7)                           | 17.1 (15.7,18.5)                           | 12.5 (11.3,13.7)                           |

|                                         |                                                                  |       |      |      |      |                  |                  |                  |
|-----------------------------------------|------------------------------------------------------------------|-------|------|------|------|------------------|------------------|------------------|
|                                         | 4                                                                | 3049  | 629  | 477  | 337  | 20.6 (19.2,22.1) | 15.6 (14.4,17.0) | 11.1 (9.99,12.2) |
|                                         | 5 - least deprived                                               | 3504  | 740  | 554  | 396  | 21.1 (19.8,22.5) | 15.8 (14.6,17.1) | 11.3 (10.3,12.4) |
| Current smoker                          | Current cigarette smoker                                         | 1146  | 238  | 186  | 130  | 20.8 (18.5,23.2) | 16.2 (14.2,18.5) | 11.3 (9.64,13.3) |
|                                         | Not current cigarette smoker                                     | 11849 | 2577 | 1981 | 1425 | 21.7 (21.0,22.5) | 16.7 (16.1,17.4) | 12.0 (11.5,12.6) |
|                                         | Prefer not to say                                                | 175   | 30   | 21   | 17   | 17.1 (12.3,23.4) | 12.0 (7.98,17.6) | 9.71 (6.15,15.0) |
| Current vaper                           | Current vaper                                                    | 735   | 161  | 123  | 87   | 21.9 (19.1,25.0) | 16.7 (14.2,19.6) | 11.8 (9.70,14.4) |
|                                         | Not current vaper                                                | 12276 | 2645 | 2035 | 1460 | 21.5 (20.8,22.3) | 16.6 (15.9,17.2) | 11.9 (11.3,12.5) |
|                                         | Prefer not to say                                                | 159   | 39   | 30   | 25   | 24.5 (18.5,31.8) | 18.9 (13.5,25.7) | 15.7 (10.9,22.2) |
| Severity of COVID-19 symptoms           | Mild symptoms                                                    | 3408  | 319  | 224  | 123  | 9.36 (8.43,10.4) | 6.57 (5.79,7.45) | 3.61 (3.03,4.29) |
|                                         | Moderate symptoms                                                | 6703  | 1325 | 991  | 667  | 19.8 (18.8,20.7) | 14.8 (14.0,15.7) | 9.95 (9.26,10.7) |
|                                         | Severe symptoms                                                  | 3059  | 1201 | 973  | 782  | 39.3 (37.5,41.0) | 31.8 (30.2,33.5) | 25.6 (24.0,27.1) |
| Treatment sought/ received for COVID-19 | No medical attention sought                                      | 8594  | 1317 | 968  | 605  | 15.3 (14.6,16.1) | 11.3 (10.6,11.9) | 7.04 (6.52,7.60) |
|                                         | Sought medical attention from pharmacist / by phone (NHS 111/GP) | 3033  | 1039 | 850  | 680  | 34.3 (32.6,36.0) | 28.0 (26.5,29.7) | 22.4 (21.0,23.9) |
|                                         | Visited GP/walk-in centre/A&E                                    | 759   | 239  | 174  | 136  | 31.5 (28.3,34.9) | 22.9 (20.1,26.0) | 17.9 (15.4,20.8) |
|                                         | Hospital admission                                               | 168   | 104  | 82   | 71   | 61.9 (54.4,68.9) | 48.8 (41.4,56.3) | 42.3 (35.0,49.8) |
| Gross household income                  | 0-14,999                                                         | 786   | 241  | 186  | 150  | 30.7 (27.5,34.0) | 23.7 (20.8,26.8) | 19.1 (16.5,22.0) |
|                                         | 15,000-49,999                                                    | 3854  | 875  | 692  | 498  | 22.7 (21.4,24.1) | 18.0 (16.8,19.2) | 12.9 (11.9,14.0) |
|                                         | 50,000-149,999                                                   | 3833  | 723  | 535  | 345  | 18.9 (17.7,20.1) | 14.0 (12.9,15.1) | 9.00 (8.14,9.95) |
|                                         | >150,000                                                         | 533   | 69   | 49   | 34   | 12.9 (10.4,16.1) | 9.19 (7.02,11.9) | 6.38 (4.60,8.78) |
| Health conditions                       | Organ transplant recipient                                       | 12    | 3    | 3    | 2    | 25.0 (8.89,53.2) | 25.0 (8.89,53.2) | 16.7 (4.70,44.8) |
|                                         | Diabetes (type I or II)                                          | 566   | 167  | 136  | 108  | 29.5 (25.9,33.4) | 24.0 (20.7,27.7) | 19.1 (16.1,22.5) |
|                                         | Heart disease or heart problems                                  | 416   | 137  | 115  | 95   | 32.9 (28.6,37.6) | 27.6 (23.6,32.1) | 22.8 (19.1,27.1) |
|                                         | Hypertension                                                     | 1326  | 395  | 321  | 263  | 29.8 (27.4,32.3) | 24.2 (22.0,26.6) | 19.8 (17.8,22.1) |
|                                         | Stroke                                                           | 73    | 24   | 22   | 17   | 32.9 (23.2,44.3) | 30.1 (20.8,41.4) | 23.3 (15.1,34.2) |
|                                         | Kidney disease                                                   | 87    | 28   | 27   | 24   | 32.2 (23.3,42.6) | 31.0 (22.3,41.4) | 27.6 (19.3,37.8) |
|                                         | Liver disease                                                    | 60    | 24   | 18   | 14   | 40.0 (28.6,52.6) | 30.0 (19.9,42.5) | 23.3 (14.4,35.4) |
|                                         | Anaemia                                                          | 243   | 75   | 60   | 53   | 30.9 (25.4,36.9) | 24.7 (19.7,30.5) | 21.8 (17.1,27.4) |
|                                         | Asthma                                                           | 1521  | 478  | 393  | 323  | 31.4 (29.1,33.8) | 25.8 (23.7,28.1) | 21.2 (19.3,23.4) |
|                                         | Other lung condition                                             | 233   | 108  | 90   | 72   | 46.4 (40.1,52.8) | 38.6 (32.6,45.0) | 30.9 (25.3,37.1) |
|                                         | Cancer                                                           | 119   | 27   | 22   | 16   | 22.7 (16.1,31.0) | 18.5 (12.5,26.4) | 13.4 (8.45,20.7) |

|                              |      |     |     |     |                  |                  |                  |
|------------------------------|------|-----|-----|-----|------------------|------------------|------------------|
| Neurological condition       | 121  | 38  | 32  | 30  | 31.4 (23.8,40.1) | 26.4 (19.4,34.9) | 24.8 (18.0,33.2) |
| Immunocompromised*           | 477  | 169 | 137 | 114 | 35.4 (31.3,39.8) | 28.7 (24.8,32.9) | 23.9 (20.3,27.9) |
| Depression                   | 1235 | 404 | 345 | 276 | 32.7 (30.2,35.4) | 27.9 (25.5,30.5) | 22.3 (20.1,24.8) |
| Anxiety                      | 1907 | 576 | 479 | 377 | 30.2 (28.2,32.3) | 25.1 (23.2,27.1) | 19.8 (18.0,21.6) |
| Psychiatric disorder (other) | 133  | 47  | 44  | 36  | 35.3 (27.7,43.8) | 33.1 (25.7,41.5) | 27.1 (20.2,35.2) |

**Table S6 Round 6 replication of symptom persistence people with symptomatic infections (extended symptom list).**

Numbers and proportions of participants who reported one or more symptoms (from a list of 37 surveyed symptoms) of COVID-19 at 12 weeks post symptom onset, among the 13,170 symptomatic participants from REACT-2 round 6 for whom we have 12 weeks' observation time and complete data.

| Variable                                     | Category          | n     | Counts at 12 weeks             |                                |                                | Prevalence at 12 weeks                     |                                            |                                            |
|----------------------------------------------|-------------------|-------|--------------------------------|--------------------------------|--------------------------------|--------------------------------------------|--------------------------------------------|--------------------------------------------|
|                                              |                   |       | Number with 1 or more symptoms | Number with 2 or more symptoms | Number with 3 or more symptoms | Prevalence 1 or more symptoms (unweighted) | Prevalence 2 or more symptoms (unweighted) | Prevalence 3 or more symptoms (unweighted) |
| All participants                             | All participants  | 13170 | 3005                           | 2385                           | 1820                           | 22.8 (22.1,23.5)                           | 18.1 (17.5,18.8)                           | 13.8 (13.2,14.4)                           |
| Sex                                          | Male              | 5100  | 947                            | 716                            | 523                            | 18.6 (17.5,19.7)                           | 14.0 (13.1,15.0)                           | 10.3 (9.45,11.1)                           |
|                                              | Female            | 8069  | 2058                           | 1669                           | 1297                           | 25.5 (24.6,26.5)                           | 20.7 (19.8,21.6)                           | 16.1 (15.3,16.9)                           |
| Age group                                    | 18-24             | 968   | 116                            | 85                             | 59                             | 12.0 (10.1,14.2)                           | 8.78 (7.16,10.7)                           | 6.10 (4.75,7.78)                           |
|                                              | 25-34             | 2266  | 364                            | 270                            | 180                            | 16.1 (14.6,17.6)                           | 11.9 (10.6,13.3)                           | 7.94 (6.90,9.13)                           |
|                                              | 35-44             | 2818  | 543                            | 432                            | 317                            | 19.3 (17.9,20.8)                           | 15.3 (14.0,16.7)                           | 11.2 (10.1,12.5)                           |
|                                              | 45-54             | 3022  | 757                            | 598                            | 460                            | 25.0 (23.5,26.6)                           | 19.8 (18.4,21.2)                           | 15.2 (14.0,16.5)                           |
|                                              | 55-64             | 2520  | 762                            | 621                            | 492                            | 30.2 (28.5,32.1)                           | 24.6 (23.0,26.4)                           | 19.5 (18.0,21.1)                           |
|                                              | 65-74             | 1197  | 343                            | 277                            | 227                            | 28.7 (26.2,31.3)                           | 23.1 (20.8,25.6)                           | 19.0 (16.8,21.3)                           |
|                                              | 74+               | 379   | 120                            | 102                            | 85                             | 31.7 (27.2,36.5)                           | 26.9 (22.7,31.6)                           | 22.4 (18.5,26.9)                           |
| Ethnicity                                    | Asian             | 590   | 100                            | 68                             | 53                             | 16.9 (14.1,20.2)                           | 11.5 (9.19,14.4)                           | 8.98 (6.93,11.6)                           |
|                                              | Black             | 204   | 48                             | 36                             | 28                             | 23.5 (18.2,29.8)                           | 17.6 (13.0,23.5)                           | 13.7 (9.67,19.1)                           |
|                                              | Mixed             | 245   | 53                             | 44                             | 32                             | 21.6 (16.9,27.2)                           | 18.0 (13.7,23.2)                           | 13.1 (9.41,17.9)                           |
|                                              | Other             | 173   | 42                             | 30                             | 21                             | 24.3 (18.5,31.2)                           | 17.3 (12.4,23.7)                           | 12.1 (8.08,17.8)                           |
|                                              | White             | 11836 | 2728                           | 2179                           | 1659                           | 23.0 (22.3,23.8)                           | 18.4 (17.7,19.1)                           | 14.0 (13.4,14.7)                           |
| Adiposity                                    | Underweight       | 163   | 36                             | 30                             | 20                             | 22.1 (16.4,29.1)                           | 18.4 (13.2,25.1)                           | 12.3 (8.09,18.2)                           |
|                                              | Normal weight     | 4511  | 880                            | 655                            | 478                            | 19.5 (18.4,20.7)                           | 14.5 (13.5,15.6)                           | 10.6 (9.73,11.5)                           |
|                                              | Overweight        | 4028  | 871                            | 691                            | 507                            | 21.6 (20.4,22.9)                           | 17.2 (16.0,18.4)                           | 12.6 (11.6,13.6)                           |
|                                              | Obese             | 2816  | 828                            | 696                            | 570                            | 29.4 (27.7,31.1)                           | 24.7 (23.2,26.3)                           | 20.2 (18.8,21.8)                           |
| Healthcare or care home worker               | Yes               | 1342  | 388                            | 317                            | 233                            | 28.9 (26.5,31.4)                           | 23.6 (21.4,26.0)                           | 17.4 (15.4,19.5)                           |
| Index of multiple deprivation (IMD) quintile | 1 - most deprived | 1480  | 368                            | 301                            | 241                            | 24.9 (22.7,27.1)                           | 20.3 (18.4,22.5)                           | 16.3 (14.5,18.3)                           |
|                                              | 2                 | 2374  | 548                            | 437                            | 338                            | 23.1 (21.4,24.8)                           | 18.4 (16.9,20.0)                           | 14.2 (12.9,15.7)                           |

|                                         |                                                                  |       |      |      |      |                  |                  |                  |
|-----------------------------------------|------------------------------------------------------------------|-------|------|------|------|------------------|------------------|------------------|
|                                         | 3                                                                | 2763  | 642  | 514  | 394  | 23.2 (21.7,24.8) | 18.6 (17.2,20.1) | 14.3 (13.0,15.6) |
|                                         | 4                                                                | 3049  | 662  | 521  | 394  | 21.7 (20.3,23.2) | 17.1 (15.8,18.5) | 12.9 (11.8,14.2) |
|                                         | 5 - least deprived                                               | 3504  | 785  | 612  | 453  | 22.4 (21.1,23.8) | 17.5 (16.2,18.8) | 12.9 (11.9,14.1) |
| Current smoker                          | Current cigarette smoker                                         | 1146  | 251  | 205  | 151  | 21.9 (19.6,24.4) | 17.9 (15.8,20.2) | 13.2 (11.3,15.3) |
|                                         | Not current cigarette smoker                                     | 11849 | 2721 | 2154 | 1651 | 23.0 (22.2,23.7) | 18.2 (17.5,18.9) | 13.9 (13.3,14.6) |
|                                         | Prefer not to say                                                | 175   | 33   | 26   | 18   | 18.9 (13.8,25.3) | 14.9 (10.3,20.9) | 10.3 (6.61,15.7) |
| Current vaper                           | Current vaper                                                    | 735   | 170  | 133  | 99   | 23.1 (20.2,26.3) | 18.1 (15.5,21.0) | 13.5 (11.2,16.1) |
|                                         | Not current vaper                                                | 12276 | 2794 | 2218 | 1694 | 22.8 (22.0,23.5) | 18.1 (17.4,18.8) | 13.8 (13.2,14.4) |
|                                         | Prefer not to say                                                | 159   | 41   | 34   | 27   | 25.8 (19.6,33.1) | 21.4 (15.7,28.4) | 17.0 (11.9,23.6) |
| Severity of COVID-19 symptoms           | Mild symptoms                                                    | 3408  | 339  | 236  | 143  | 9.95 (8.99,11.0) | 6.92 (6.12,7.83) | 4.20 (3.57,4.92) |
|                                         | Moderate symptoms                                                | 6703  | 1404 | 1082 | 780  | 20.9 (20.0,21.9) | 16.1 (15.3,17.0) | 11.6 (10.9,12.4) |
|                                         | Severe symptoms                                                  | 3059  | 1262 | 1067 | 897  | 41.3 (39.5,43.0) | 34.9 (33.2,36.6) | 29.3 (27.7,31.0) |
| Treatment sought/ received for COVID-19 | No medical attention sought                                      | 8594  | 1390 | 1040 | 711  | 16.2 (15.4,17.0) | 12.1 (11.4,12.8) | 8.27 (7.71,8.87) |
|                                         | Sought medical attention from pharmacist / by phone (NHS 111/GP) | 3033  | 1108 | 931  | 782  | 36.5 (34.8,38.3) | 30.7 (29.1,32.4) | 25.8 (24.3,27.4) |
|                                         | Visited GP/walk-in centre/A&E                                    | 759   | 248  | 198  | 157  | 32.7 (29.4,36.1) | 26.1 (23.1,29.3) | 20.7 (18.0,23.7) |
|                                         | Hospital admission                                               | 168   | 105  | 93   | 79   | 62.5 (55.0,69.5) | 55.4 (47.8,62.7) | 47.0 (39.6,54.6) |
| Gross household income                  | 0-14,999                                                         | 786   | 254  | 208  | 168  | 32.3 (29.1,35.7) | 26.5 (23.5,29.7) | 21.4 (18.7,24.4) |
|                                         | 15,000-49,999                                                    | 3854  | 921  | 740  | 584  | 23.9 (22.6,25.3) | 19.2 (18.0,20.5) | 15.2 (14.1,16.3) |
|                                         | 50,000-149,999                                                   | 3833  | 762  | 586  | 410  | 19.9 (18.6,21.2) | 15.3 (14.2,16.5) | 10.7 (9.76,11.7) |
|                                         | >150,000                                                         | 533   | 75   | 55   | 39   | 14.1 (11.4,17.3) | 10.3 (8.01,13.2) | 7.32 (5.40,9.85) |
| Health conditions                       | Organ transplant recipient                                       | 12    | 3    | 3    | 3    | 25.0 (8.89,53.2) | 25.0 (8.89,53.2) | 25.0 (8.89,53.2) |
|                                         | Diabetes (type I or II)                                          | 566   | 176  | 145  | 121  | 31.1 (27.4,35.0) | 25.6 (22.2,29.4) | 21.4 (18.2,24.9) |
|                                         | Heart disease or heart problems                                  | 416   | 143  | 124  | 105  | 34.4 (30.0,39.1) | 29.8 (25.6,34.4) | 25.2 (21.3,29.6) |
|                                         | Hypertension                                                     | 1326  | 418  | 345  | 300  | 31.5 (29.1,34.1) | 26.0 (23.7,28.4) | 22.6 (20.5,25.0) |
|                                         | Stroke                                                           | 73    | 26   | 24   | 20   | 35.6 (25.6,47.1) | 32.9 (23.2,44.3) | 27.4 (18.5,38.6) |
|                                         | Kidney disease                                                   | 87    | 28   | 27   | 25   | 32.2 (23.3,42.6) | 31.0 (22.3,41.4) | 28.7 (20.3,39.0) |
|                                         | Liver disease                                                    | 60    | 25   | 22   | 17   | 41.7 (30.1,54.3) | 36.7 (25.6,49.3) | 28.3 (18.5,40.8) |
|                                         | Anaemia                                                          | 243   | 83   | 66   | 58   | 34.2 (28.5,40.3) | 27.2 (22.0,33.1) | 23.9 (18.9,29.6) |
|                                         | Asthma                                                           | 1521  | 495  | 421  | 353  | 32.5 (30.2,34.9) | 27.7 (25.5,30.0) | 23.2 (21.2,25.4) |
|                                         | Other lung condition                                             | 233   | 111  | 98   | 89   | 47.6 (41.3,54.0) | 42.1 (35.9,48.5) | 38.2 (32.2,44.6) |

|                              |      |     |     |     |                  |                  |                  |
|------------------------------|------|-----|-----|-----|------------------|------------------|------------------|
| Cancer                       | 119  | 29  | 24  | 19  | 24.4 (17.5,32.8) | 20.2 (13.9,28.3) | 16.0 (10.5,23.6) |
| Neurological condition       | 121  | 39  | 35  | 31  | 32.2 (24.6,41.0) | 28.9 (21.6,37.6) | 25.6 (18.7,34.1) |
| Immunocompromised*           | 477  | 180 | 148 | 134 | 37.7 (33.5,42.2) | 31.0 (27.0,35.3) | 28.1 (24.2,32.3) |
| Depression                   | 1235 | 425 | 361 | 313 | 34.4 (31.8,37.1) | 29.2 (26.8,31.8) | 25.3 (23.0,27.8) |
| Anxiety                      | 1907 | 613 | 516 | 431 | 32.1 (30.1,34.3) | 27.1 (25.1,29.1) | 22.6 (20.8,24.5) |
| Psychiatric disorder (other) | 133  | 49  | 44  | 39  | 36.8 (29.1,45.3) | 33.1 (25.7,41.5) | 29.3 (22.3,37.6) |



**Table S7 Weighted prevalence of persistent symptoms in the population in round 6.**

Numbers and weighted prevalence of currently or previously reported persistent symptoms in the validation REACT-2 study population (rounds 6). Table shows prevalence of any of the 27 surveyed symptoms. The final three columns show prevalence weighted to be representative of the adult population of England, by age, sex, ethnicity, lower-tier local authority population, and index of multiple deprivation (IMD).

| Variable                                     | Category          | n     | Counts at 12 weeks             |                                |                                | Prevalence at 12 weeks                     |                                            |                                            |
|----------------------------------------------|-------------------|-------|--------------------------------|--------------------------------|--------------------------------|--------------------------------------------|--------------------------------------------|--------------------------------------------|
|                                              |                   |       | Number with 1 or more symptoms | Number with 2 or more symptoms | Number with 3 or more symptoms | Prevalence 1 or more symptoms (weighted) % | Prevalence 2 or more symptoms (weighted) % | Prevalence 3 or more symptoms (weighted) % |
| All participants                             |                   | 97727 | 3094                           | 2384                           | 1729                           | 3.06 (2.98,3.14)                           | 2.28 (2.22,2.36)                           | 1.61 (1.56,1.67)                           |
| Sex                                          | Women             | 56871 | 2124                           | 1660                           | 1230                           | 2.45 (2.35,2.55)                           | 1.71 (1.63,1.80)                           | 1.13 (1.06,1.20)                           |
|                                              | Men               | 40853 | 970                            | 724                            | 499                            | 3.64 (3.52,3.76)                           | 2.83 (2.73,2.94)                           | 2.08 (1.99,2.17)                           |
| Age group                                    | 18-24             | 4982  | 115                            | 85                             | 58                             | 2.07 (1.90,2.26)                           | 1.40 (1.26,1.55)                           | 0.977 (0.861,1.11)                         |
|                                              | 25-34             | 11791 | 365                            | 261                            | 163                            | 3.04 (2.87,3.22)                           | 2.07 (1.93,2.22)                           | 1.29 (1.18,1.41)                           |
|                                              | 35-44             | 15417 | 562                            | 437                            | 303                            | 3.63 (3.44,3.82)                           | 2.84 (2.67,3.02)                           | 1.94 (1.80,2.08)                           |
|                                              | 45-54             | 18980 | 771                            | 586                            | 429                            | 4.04 (3.85,4.24)                           | 3.09 (2.92,3.26)                           | 2.32 (2.17,2.47)                           |
|                                              | 55-64             | 20760 | 799                            | 630                            | 470                            | 4.04 (3.63,4.49)                           | 3.23 (2.86,3.64)                           | 2.45 (2.13,2.81)                           |
|                                              | 65-74             | 17770 | 355                            | 284                            | 223                            | 2.02 (1.71,2.39)                           | 1.60 (1.33,1.94)                           | 1.30 (1.05,1.60)                           |
|                                              | 74+               | 8027  | 127                            | 101                            | 83                             | 1.55 (1.40,1.72)                           | 1.25 (1.12,1.40)                           | 0.952 (0.836,1.08)                         |
| Ethnicity                                    | Asian             | 3819  | 98                             | 69                             | 52                             | 2.22 (1.99,2.47)                           | 1.50 (1.31,1.71)                           | 1.16 (0.998,1.35)                          |
|                                              | Black             | 1214  | 52                             | 39                             | 30                             | 3.66 (3.19,4.18)                           | 3.11 (2.69,3.60)                           | 2.45 (2.07,2.89)                           |
|                                              | Mixed             | 1224  | 53                             | 38                             | 32                             | 5.57 (4.72,6.57)                           | 2.85 (2.25,3.59)                           | 2.39 (1.85,3.08)                           |
|                                              | Other             | 968   | 46                             | 30                             | 20                             | 4.90 (4.07,5.90)                           | 3.01 (2.37,3.81)                           | 2.13 (1.60,2.83)                           |
|                                              | White             | 89720 | 2811                           | 2179                           | 1571                           | 3.04 (2.95,3.12)                           | 2.30 (2.23,2.38)                           | 1.60 (1.53,1.66)                           |
| ADIPOSIITY                                   | Normal weight     | 34950 | 883                            | 641                            | 446                            | 4.23 (3.56,5.03)                           | 2.67 (2.14,3.33)                           | 2.08 (1.62,2.67)                           |
|                                              | Obese             | 18732 | 869                            | 709                            | 542                            | 2.49 (2.38,2.62)                           | 1.74 (1.65,1.85)                           | 1.16 (1.08,1.25)                           |
|                                              | Overweight        | 30257 | 890                            | 689                            | 476                            | 2.87 (2.73,3.02)                           | 2.18 (2.06,2.31)                           | 1.46 (1.36,1.57)                           |
|                                              | Underweight       | 1212  | 40                             | 27                             | 18                             | 4.41 (4.19,4.64)                           | 3.61 (3.41,3.82)                           | 2.73 (2.55,2.91)                           |
| Healthcare or care home worker               | Yes               | 6889  | 405                            | 308                            | 218                            | 5.23 (4.86,5.62)                           | 4.01 (3.69,4.36)                           | 2.79 (2.52,3.08)                           |
| Index of multiple deprivation (IMD) quintile | 1 - most deprived | 9685  | 377                            | 307                            | 239                            | 3.41 (3.22,3.60)                           | 2.68 (2.52,2.86)                           | 2.01 (1.87,2.16)                           |
|                                              | 2                 | 15847 | 580                            | 456                            | 321                            | 3.29 (3.12,3.48)                           | 2.41 (2.26,2.57)                           | 1.64 (1.52,1.78)                           |
|                                              | 3                 | 20989 | 655                            | 504                            | 371                            | 3.01 (2.83,3.19)                           | 2.22 (2.07,2.38)                           | 1.58 (1.46,1.72)                           |

|                                      |                                                                  |       |      |      |      |                  |                  |                   |
|--------------------------------------|------------------------------------------------------------------|-------|------|------|------|------------------|------------------|-------------------|
|                                      | 4                                                                | 24170 | 685  | 516  | 364  | 2.69 (2.52,2.87) | 1.96 (1.82,2.11) | 1.33 (1.21,1.46)  |
|                                      | 5 - least deprived                                               | 27036 | 797  | 601  | 434  | 2.83 (2.66,3.02) | 2.12 (1.97,2.28) | 1.47 (1.35,1.61)  |
| Current smoker                       | Current cigarette smoker                                         | 8041  | 266  | 206  | 148  | 3.26 (3.01,3.53) | 2.50 (2.28,2.74) | 1.57 (1.39,1.76)  |
|                                      | Not current cigarette smoker                                     | 88392 | 2791 | 2153 | 1561 | 3.05 (2.96,3.13) | 2.27 (2.20,2.35) | 1.63 (1.57,1.69)  |
|                                      | Prefer not to say                                                | 1294  | 37   | 25   | 20   | 2.26 (1.77,2.87) | 1.55 (1.16,2.08) | 1.09 (0.772,1.55) |
| Current vaper                        | Current vaper                                                    | 4942  | 175  | 134  | 97   | 3.48 (3.16,3.83) | 2.70 (2.42,3.02) | 1.86 (1.63,2.12)  |
|                                      | Not current vaper                                                | 91627 | 2877 | 2219 | 1606 | 3.03 (2.95,3.11) | 2.26 (2.19,2.33) | 1.60 (1.54,1.66)  |
|                                      | Prefer not to say                                                | 1158  | 42   | 31   | 26   | 2.87 (2.28,3.61) | 2.13 (1.63,2.79) | 1.68 (1.24,2.27)  |
| Severity of COVID symptoms           | Mild symptoms                                                    | 3817  | 338  | 235  | 132  | 7.48 (6.96,8.03) | 4.70 (4.29,5.15) | 2.54 (2.24,2.88)  |
|                                      | Moderate symptoms                                                | 7367  | 1425 | 1070 | 723  | 16.1 (15.6,16.7) | 11.9 (11.4,12.5) | 7.88 (7.47,8.32)  |
|                                      | Severe symptoms                                                  | 3378  | 1319 | 1071 | 866  | 32.3 (31.2,33.4) | 25.7 (24.6,26.7) | 20.4 (19.4,21.4)  |
| Treatment sought/ received for COVID | No medical attention sought                                      | 198   | 117  | 93   | 80   | 12.4 (11.9,12.8) | 8.75 (8.37,9.14) | 5.25 (4.96,5.56)  |
|                                      | Sought medical attention from pharmacist / by phone (NHS 111/GP) | 9450  | 1407 | 1037 | 657  | 27.0 (26.0,28.0) | 21.4 (20.5,22.4) | 17.4 (16.5,18.3)  |
|                                      | Visited GP/walk-in centre/A&E                                    | 3418  | 1138 | 931  | 742  | 25.2 (23.0,27.4) | 19.0 (17.1,21.1) | 14.8 (13.1,16.7)  |
|                                      | Hospital admission                                               | 817   | 259  | 191  | 152  | 52.7 (47.7,57.7) | 42.3 (37.5,47.3) | 33.8 (29.2,38.6)  |
| Gross household income               | 0-14,999                                                         | 2906  | 73   | 53   | 37   | 3.71 (3.40,4.05) | 2.72 (2.45,3.01) | 2.24 (2.00,2.51)  |
|                                      | 15,000-49,999                                                    | 6882  | 277  | 214  | 172  | 3.30 (3.15,3.46) | 2.50 (2.37,2.64) | 1.75 (1.64,1.87)  |
|                                      | 50,000-149,999                                                   | 29163 | 966  | 764  | 558  | 3.04 (2.89,3.20) | 2.26 (2.13,2.41) | 1.42 (1.32,1.54)  |
|                                      | >150,000                                                         | 23678 | 759  | 565  | 366  | 2.29 (1.91,2.73) | 1.63 (1.32,2.01) | 1.12 (0.870,1.45) |
| Comorbidities                        | Organ transplant recipient                                       | 115   | 3    | 3    | 2    | 3.89 (1.90,7.81) | 3.89 (1.90,7.81) | 1.11 (0.305,3.96) |
|                                      | Diabetes (type I or II)                                          | 5537  | 187  | 153  | 122  | 3.38 (3.00,3.80) | 2.84 (2.50,3.23) | 2.24 (1.93,2.59)  |
|                                      | Heart disease or heart problems                                  | 4170  | 158  | 134  | 113  | 3.16 (2.75,3.62) | 2.78 (2.40,3.22) | 2.23 (1.89,2.63)  |

|                                                                  |       |     |     |     |                  |                  |                   |
|------------------------------------------------------------------|-------|-----|-----|-----|------------------|------------------|-------------------|
| Hypertension (high blood pressure)                               | 12958 | 436 | 357 | 293 | 3.19 (2.93,3.46) | 2.58 (2.35,2.83) | 2.14 (1.93,2.37)  |
| Stroke                                                           | 591   | 24  | 22  | 17  | 1.93 (1.21,3.07) | 1.82 (1.12,2.93) | 1.48 (0.864,2.51) |
| Kidney disease                                                   | 750   | 33  | 31  | 28  | 5.70 (4.50,7.19) | 4.92 (3.82,6.32) | 4.15 (3.14,5.45)  |
| Liver disease                                                    | 426   | 29  | 23  | 18  | 8.24 (6.41,10.5) | 6.37 (4.78,8.44) | 4.63 (3.30,6.46)  |
| Anaemia                                                          | 1532  | 95  | 80  | 71  | 6.13 (5.37,6.99) | 4.86 (4.18,5.63) | 4.53 (3.88,5.29)  |
| Asthma                                                           | 9508  | 518 | 426 | 352 | 4.65 (4.36,4.97) | 3.88 (3.61,4.17) | 3.23 (2.98,3.50)  |
| Other lung condition                                             | 2333  | 117 | 96  | 77  | 4.72 (4.05,5.50) | 3.60 (3.01,4.29) | 3.08 (2.54,3.73)  |
| Cancer                                                           | 1626  | 34  | 27  | 21  | 2.10 (1.58,2.80) | 1.78 (1.30,2.43) | 1.54 (1.10,2.16)  |
| Condition affecting the brain and nerves                         | 1120  | 41  | 34  | 32  | 3.44 (2.71,4.35) | 2.55 (1.93,3.36) | 2.45 (1.84,3.24)  |
| A weakened immune system/reduced ability to deal with infections | 3662  | 190 | 154 | 130 | 5.64 (5.07,6.27) | 4.73 (4.21,5.31) | 4.02 (3.54,4.57)  |
| Depression                                                       | 7262  | 445 | 382 | 308 | 6.03 (5.66,6.41) | 4.96 (4.63,5.31) | 3.93 (3.64,4.25)  |
| Anxiety                                                          | 10687 | 633 | 526 | 417 | 5.40 (5.11,5.70) | 4.53 (4.27,4.81) | 3.51 (3.28,3.75)  |
| Psychiatric disorder                                             | 634   | 52  | 48  | 40  | 8.80 (7.50,10.3) | 7.98 (6.74,9.42) | 5.70 (4.66,6.95)  |

**Table S8 Weighted prevalence of persistent symptoms in the population in round 6 (extended symptom set).**

Numbers and weighted prevalence of currently or previously reported persistent symptoms in the validation REACT-2 study population (rounds 6). Table shows prevalence of any of the 37 surveyed symptoms. The final three columns show prevalence weighted to be representative of the adult population of England, by age, sex, ethnicity, lower-tier local authority population, and index of multiple deprivation (IMD).

| Variable                            | Category          | n     | Counts at 12 weeks             |                                |                                | Prevalence at 12 weeks                     |                                            |                                            |
|-------------------------------------|-------------------|-------|--------------------------------|--------------------------------|--------------------------------|--------------------------------------------|--------------------------------------------|--------------------------------------------|
|                                     |                   |       | Number with 1 or more symptoms | Number with 2 or more symptoms | Number with 3 or more symptoms | Prevalence 1 or more symptoms (weighted) % | Prevalence 2 or more symptoms (weighted) % | Prevalence 3 or more symptoms (weighted) % |
| All participants                    |                   | 97727 | 3274                           | 2606                           | 2001                           | 3.26 (3.18,3.34)                           | 2.50 (2.43,2.57)                           | 1.86 (1.80,1.92)                           |
| Sex                                 | Women             | 40853 | 1032                           | 784                            | 577                            | 2.63 (2.53,2.74)                           | 1.91 (1.82,2.00)                           | 1.32 (1.24,1.40)                           |
|                                     | Men               | 56871 | 2242                           | 1822                           | 1424                           | 3.86 (3.74,3.99)                           | 3.07 (2.96,3.18)                           | 2.38 (2.28,2.48)                           |
| Age group                           | 18-24             | 4982  | 121                            | 90                             | 64                             | 2.21 (2.03,2.40)                           | 1.52 (1.37,1.68)                           | 1.04 (0.923,1.18)                          |
|                                     | 25-34             | 11791 | 384                            | 286                            | 191                            | 3.25 (3.08,3.43)                           | 2.31 (2.16,2.46)                           | 1.55 (1.43,1.68)                           |
|                                     | 35-44             | 15417 | 601                            | 483                            | 357                            | 3.96 (3.76,4.16)                           | 3.12 (2.95,3.31)                           | 2.31 (2.16,2.47)                           |
|                                     | 45-54             | 18980 | 811                            | 641                            | 492                            | 4.24 (4.05,4.45)                           | 3.34 (3.17,3.53)                           | 2.60 (2.45,2.76)                           |
|                                     | 55-64             | 20760 | 845                            | 691                            | 553                            | 4.31 (3.89,4.78)                           | 3.53 (3.14,3.95)                           | 2.80 (2.46,3.19)                           |
|                                     | 65-74             | 17770 | 380                            | 305                            | 252                            | 2.18 (1.85,2.56)                           | 1.71 (1.42,2.06)                           | 1.45 (1.19,1.77)                           |
|                                     | 74+               | 8027  | 132                            | 110                            | 92                             | 1.61 (1.46,1.78)                           | 1.35 (1.21,1.50)                           | 1.10 (0.971,1.24)                          |
| Ethnicity                           | Asian             | 3819  | 113                            | 78                             | 60                             | 2.65 (2.39,2.92)                           | 1.68 (1.48,1.91)                           | 1.32 (1.14,1.52)                           |
|                                     | Black             | 1214  | 58                             | 43                             | 35                             | 4.07 (3.58,4.62)                           | 3.22 (2.79,3.72)                           | 2.70 (2.31,3.16)                           |
|                                     | Mixed             | 1224  | 56                             | 47                             | 35                             | 5.99 (5.11,7.02)                           | 3.52 (2.85,4.33)                           | 2.60 (2.03,3.31)                           |
|                                     | Other             | 968   | 50                             | 37                             | 24                             | 5.18 (4.32,6.20)                           | 4.12 (3.36,5.04)                           | 2.45 (1.88,3.19)                           |
|                                     | White             | 89720 | 2961                           | 2371                           | 1818                           | 3.21 (3.12,3.30)                           | 2.50 (2.42,2.58)                           | 1.85 (1.78,1.92)                           |
| ADIPOSITY                           | Underweight       | 1212  | 40                             | 34                             | 24                             | 4.23 (3.56,5.03)                           | 3.23 (2.64,3.94)                           | 2.53 (2.02,3.17)                           |
|                                     | Normal weight     | 34950 | 944                            | 708                            | 519                            | 2.66 (2.54,2.79)                           | 1.94 (1.83,2.05)                           | 1.34 (1.25,1.43)                           |
|                                     | Overweight        | 30257 | 951                            | 754                            | 554                            | 3.10 (2.96,3.26)                           | 2.37 (2.24,2.50)                           | 1.70 (1.60,1.82)                           |
|                                     | Obese             | 18732 | 905                            | 759                            | 627                            | 4.66 (4.43,4.89)                           | 3.89 (3.68,4.11)                           | 3.09 (2.91,3.29)                           |
| Healthcare or care home worker      | Yes               | 6889  | 430                            | 351                            | 263                            | 5.61 (5.23,6.02)                           | 4.44 (4.10,4.80)                           | 3.29 (3.00,3.61)                           |
| Index of multiple deprivation (IMD) | 1 - most deprived | 9685  | 404                            | 332                            | 267                            | 3.72 (3.53,3.92)                           | 2.88 (2.71,3.06)                           | 2.25 (2.11,2.41)                           |
|                                     | 2                 | 15847 | 610                            | 489                            | 383                            | 3.52 (3.34,3.71)                           | 2.65 (2.49,2.82)                           | 1.92 (1.79,2.06)                           |

|                                      |                                                                  |       |      |      |                  |                  |                  |                   |
|--------------------------------------|------------------------------------------------------------------|-------|------|------|------------------|------------------|------------------|-------------------|
| quintile                             | 3                                                                | 20989 | 692  | 552  | 425              | 3.14 (2.96,3.32) | 2.42 (2.27,2.58) | 1.86 (1.72,2.00)  |
|                                      | 4                                                                | 24170 | 722  | 568  | 431              | 2.86 (2.69,3.04) | 2.14 (1.99,2.30) | 1.57 (1.45,1.71)  |
|                                      | 5 - least deprived                                               | 27036 | 846  | 665  | 495              | 3.00 (2.82,3.19) | 2.37 (2.21,2.54) | 1.66 (1.53,1.80)  |
| Current smoker                       | Current cigarette smoker                                         | 8041  | 280  | 227  | 170              | 3.48 (3.23,3.76) | 2.75 (2.52,3.00) | 1.98 (1.79,2.19)  |
|                                      | Not current cigarette smoker                                     | 88392 | 2954 | 2347 | 1809             | 3.25 (3.16,3.34) | 2.48 (2.40,2.56) | 1.86 (1.79,1.93)  |
|                                      | Prefer not to say                                                | 1294  | 40   | 32   | 22               | 2.51 (1.99,3.15) | 2.08 (1.62,2.68) | 1.13 (0.801,1.59) |
| Current vaper                        | Current vaper                                                    | 4942  | 185  | 146  | 111              | 3.87 (3.53,4.24) | 2.90 (2.61,3.23) | 2.04 (1.80,2.32)  |
|                                      | Not current vaper                                                | 91627 | 3045 | 2424 | 1862             | 3.22 (3.14,3.31) | 2.47 (2.40,2.55) | 1.85 (1.78,1.91)  |
|                                      | Prefer not to say                                                | 1158  | 44   | 36   | 28               | 2.95 (2.35,3.70) | 2.46 (1.92,3.16) | 1.76 (1.31,2.37)  |
| Severity of COVID symptoms           | Mild symptoms                                                    | 3817  | 360  | 247  | 153              | 8.00 (7.47,8.57) | 4.88 (4.46,5.34) | 2.95 (2.62,3.31)  |
|                                      | Moderate symptoms                                                | 7367  | 1510 | 1169 | 850              | 17.2 (16.6,17.8) | 13.0 (12.4,13.5) | 9.20 (8.75,9.67)  |
|                                      | Severe symptoms                                                  | 3378  | 1390 | 1178 | 990              | 34.3 (33.2,35.5) | 28.6 (27.6,29.7) | 23.2 (22.2,24.2)  |
| Treatment sought/ received for COVID | No medical attention sought                                      | 9450  | 1485 | 1114 | 771              | 13.1 (12.6,13.5) | 9.38 (8.99,9.78) | 6.23 (5.91,6.57)  |
|                                      | Sought medical attention from pharmacist / by phone (NHS 111/GP) | 3418  | 1215 | 1023 | 857              | 29.4 (28.3,30.4) | 23.6 (22.7,24.6) | 19.8 (18.9,20.7)  |
|                                      | Visited GP/walk-in centre/A&E                                    | 817   | 271  | 216  | 173              | 26.7 (24.5,29.0) | 21.5 (19.5,23.7) | 16.1 (14.3,18.0)  |
|                                      | Hospital admission                                               | 198   | 120  | 106  | 91               | 53.9 (48.9,58.8) | 49.7 (44.8,54.7) | 38.4 (33.7,43.4)  |
| Gross household income               | 0-14,999                                                         | 6882  | 293  | 239  | 193              | 3.87 (3.55,4.21) | 3.17 (2.88,3.49) | 2.54 (2.29,2.83)  |
|                                      | 15,000-49,999                                                    | 29163 | 1019 | 822  | 652              | 3.59 (3.43,3.75) | 2.68 (2.54,2.82) | 2.04 (1.92,2.16)  |
|                                      | 50,000-149,999                                                   | 23678 | 801  | 617  | 435              | 3.21 (3.06,3.38) | 2.47 (2.33,2.61) | 1.67 (1.56,1.80)  |
|                                      | >150,000                                                         | 2906  | 79   | 59   | 42               | 2.52 (2.13,2.98) | 1.84 (1.51,2.24) | 1.24 (0.972,1.58) |
| Comorbidities                        | Organ transplant recipient                                       | 115   | 3    | 3    | 3                | 3.89 (1.90,7.81) | 3.89 (1.90,7.81) | 3.89 (1.90,7.81)  |
|                                      | Diabetes (type I or II)                                          | 5537  | 197  | 164  | 138              | 3.56 (3.18,4.00) | 3.06 (2.70,3.46) | 2.54 (2.22,2.91)  |
|                                      | Heart disease or heart problems                                  | 4170  | 164  | 144  | 124              | 3.22 (2.81,3.69) | 3.01 (2.61,3.47) | 2.51 (2.15,2.93)  |
|                                      | Hypertension (high blood pressure)                               | 12958 | 461  | 386  | 336              | 3.39 (3.13,3.68) | 2.81 (2.57,3.07) | 2.40 (2.18,2.65)  |
|                                      | Stroke                                                           | 591   | 26   | 24   | 20               | 2.15 (1.38,3.34) | 1.93 (1.21,3.07) | 1.82 (1.12,2.93)  |
|                                      | Kidney disease                                                   | 750   | 33   | 31   | 29               | 5.70 (4.50,7.19) | 4.92 (3.82,6.32) | 4.49 (3.44,5.84)  |
|                                      | Liver disease                                                    | 426   | 30   | 27   | 22               | 8.24 (6.41,10.5) | 7.95 (6.16,10.2) | 6.37 (4.78,8.44)  |
|                                      | Anaemia                                                          | 1532  | 103  | 86   | 76               | 6.99 (6.18,7.90) | 5.27 (4.57,6.08) | 4.59 (3.93,5.35)  |
|                                      | Asthma                                                           | 9508  | 537  | 458  | 384              | 4.75 (4.45,5.08) | 4.13 (3.85,4.43) | 3.48 (3.22,3.76)  |
| Other lung condition                 | 2333                                                             | 120   | 106  | 94   | 4.82 (4.14,5.60) | 4.18 (3.54,4.92) | 3.63 (3.04,4.32) |                   |

|                                                                  |       |     |     |     |                  |                  |                  |
|------------------------------------------------------------------|-------|-----|-----|-----|------------------|------------------|------------------|
| Cancer                                                           | 1626  | 36  | 29  | 24  | 2.15 (1.62,2.86) | 1.87 (1.38,2.54) | 1.54 (1.10,2.16) |
| Condition affecting the brain and nerves                         | 1120  | 42  | 37  | 33  | 3.64 (2.89,4.58) | 3.02 (2.34,3.88) | 2.60 (1.98,3.41) |
| A weakened immune system/reduced ability to deal with infections | 3662  | 201 | 167 | 152 | 5.94 (5.36,6.58) | 4.94 (4.41,5.53) | 4.60 (4.09,5.18) |
| Depression                                                       | 7262  | 466 | 400 | 348 | 6.36 (5.99,6.75) | 5.26 (4.92,5.63) | 4.41 (4.10,4.75) |
| Anxiety                                                          | 10687 | 670 | 569 | 475 | 5.83 (5.53,6.14) | 4.87 (4.60,5.15) | 3.92 (3.67,4.18) |
| Psychiatric disorder                                             | 634   | 54  | 49  | 43  | 8.92 (7.62,10.4) | 8.04 (6.80,9.49) | 6.77 (5.64,8.12) |

**Table S9 Odds ratios for persistent symptoms at 12 weeks among symptomatic respondents.**

Derived from logistic regression models (forest plot shown in Figure 2)

| Predictor                                    | Level                                    | Crude (univariable) OR | Adjusted on age and sex | Mutually adjusted* |
|----------------------------------------------|------------------------------------------|------------------------|-------------------------|--------------------|
| Sex                                          | Male [reference]                         | -                      | -                       | -                  |
|                                              | Female                                   | 1.46 [1.42-1.51]       | 1.51 [1.46-1.55]        | 1.38 [1.32-1.45]   |
| Age group                                    | 18-24                                    | 0.58 [0.54-0.62]       | 0.56 [0.53-0.6]         | 0.64 [0.57-0.72]   |
|                                              | 25-34                                    | 0.6 [0.57-0.63]        | 0.58 [0.55-0.61]        | 0.6 [0.56-0.65]    |
|                                              | 35-44                                    | 0.65 [0.62-0.68]       | 0.64 [0.61-0.67]        | 0.64 [0.59-0.68]   |
|                                              | 45-54                                    | 0.86 [0.83-0.9]        | 0.86 [0.82-0.9]         | 0.85 [0.8-0.91]    |
|                                              | 55-64 [reference]                        | -                      | -                       | -                  |
|                                              | 65-74                                    | 1.16 [1.1-1.22]        | 1.16 [1.1-1.23]         | 1.16 [1.01-1.33]   |
|                                              | 74+                                      | 1.51 [1.38-1.64]       | 1.47 [1.35-1.61]        | 1.19 [0.71-1.98]   |
| Ethnicity                                    | White [reference]                        | -                      | -                       | -                  |
|                                              | Asian                                    | 0.71 [0.65-0.77]       | 0.8 [0.74-0.88]         | 0.84 [0.74-0.96]   |
|                                              | Black                                    | 0.99 [0.85-1.15]       | 1.06 [0.91-1.24]        | 1.02 [0.81-1.28]   |
|                                              | Mixed                                    | 1.05 [0.94-1.18]       | 1.19 [1.06-1.33]        | 1.16 [0.98-1.38]   |
|                                              | Other                                    | 0.99 [0.86-1.14]       | 1.05 [0.91-1.22]        | 1.05 [0.83-1.32]   |
| Adiposity                                    | Underweight                              | 1.15 [1.01-1.33]       | 1.17 [1.02-1.35]        | 0.99 [0.79-1.25]   |
|                                              | Normal weight [reference]                | -                      | -                       | -                  |
|                                              | Overweight                               | 1.14 [1.1-1.18]        | 1.16 [1.12-1.21]        | 1.15 [1.09-1.21]   |
|                                              | Obese                                    | 1.52 [1.46-1.58]       | 1.53 [1.47-1.59]        | 1.39 [1.32-1.48]   |
| Healthcare or care home worker               | No [reference]                           | -                      | -                       | -                  |
|                                              | Yes                                      | 1.48 [1.39-1.56]       | 1.33 [1.26-1.41]        | 1.26 [1.17-1.36]   |
| Index of multiple deprivation (IMD) quintile | 1 - most deprived                        | 1.19 [1.12-1.25]       | 1.24 [1.17-1.31]        | 1.09 [1-1.19]      |
|                                              | 2                                        | 1.05 [1-1.1]           | 1.08 [1.03-1.13]        | 1.04 [0.97-1.12]   |
|                                              | 3 [reference]                            | -                      | -                       | -                  |
|                                              | 4                                        | 0.94 [0.9-0.98]        | 0.92 [0.88-0.97]        | 0.98 [0.92-1.05]   |
|                                              | 5 - least deprived                       | 0.85 [0.82-0.89]       | 0.84 [0.8-0.87]         | 0.91 [0.85-0.97]   |
| Current smoker                               | Not current cigarette smoker [reference] | -                      | -                       | -                  |
|                                              | Current cigarette smoker                 | 1.23 [1.17-1.29]       | 1.35 [1.28-1.41]        | 1.11 [1.03-1.2]    |
|                                              | Prefer not to say                        | 0.92 [0.79-1.08]       | 1.03 [0.88-1.21]        | 0.84 [0.63-1.14]   |
| Current vaper                                | Not current vaper [reference]            | -                      | -                       | -                  |
|                                              | Current vaper                            | 1.12 [1.06-1.19]       | 1.26 [1.18-1.34]        | 1.11 [1.01-1.21]   |
|                                              | Prefer not to say                        | 0.84 [0.69-1.03]       | 0.94 [0.77-1.16]        | 0.94 [0.59-1.51]   |
| Severity of COVID-19 symptoms                | Mild symptoms [reference]                | -                      | -                       | -                  |
|                                              | Moderate symptoms                        | 1.82 [1.75-1.89]       | 1.74 [1.68-1.81]        | 1.51 [1.43-1.6]    |
|                                              | Severe symptoms                          | 3.25 [3.11-3.39]       | 3.02 [2.89-3.15]        | 2.26 [2.1-2.42]    |
| Treatment sought/ received for COVID-19      | No medical attention sought [reference]  | -                      | -                       | -                  |
|                                              | Pharmacist / by phone (NHS 111/GP)       | 2.07 [2-2.14]          | 2.05 [1.98-2.12]        | 2.02 [1.92-2.13]   |
|                                              | Visited GP/walk-in centre/A&E            | 1.81 [1.72-1.91]       | 1.67 [1.58-1.76]        | 1.57 [1.44-1.71]   |
|                                              | Hospital admission                       | 3.98 [3.37-4.69]       | 3.46 [2.93-4.09]        | 3.45 [2.57-4.64]   |
| Gross household income                       | 0-14,999                                 | 1.51 [1.42-1.61]       | 1.39 [1.3-1.48]         | 1.36 [1.22-1.51]   |
|                                              | 15,000-49,999 [reference]                | -                      | -                       | -                  |
|                                              | 50,000-149,999                           | 0.7 [0.67-0.72]        | 0.76 [0.73-0.79]        | 0.84 [0.8-0.88]    |

|                                        |                  |                  |                  |
|----------------------------------------|------------------|------------------|------------------|
| >150,000                               | 0.59 [0.54-0.64] | 0.64 [0.58-0.69] | 0.8 [0.73-0.88]  |
| Hospitalised with COVID No [reference] | -                | -                | -                |
| Yes                                    | 3.08 [2.61-3.63] | 2.72 [2.3-3.21]  | 3.45 [2.57-4.64] |

*\*Owing to missing data in some variables, the total n for the mutually adjusted model is 55,730*



**Table S10 Characteristics of 12-week symptom clusters in rounds 3–5.**

Characteristics of 12-week symptom clusters among 70% sub-sample (n=53,309) of people with symptoms and date of symptom onset 12 weeks or more before survey date -- compared with those who were not experiencing any persistent symptoms at 12 weeks. For categorical variables, column-wise within-group percentages shown in parentheses, with 95% confidence intervals in square brackets. Cluster L2 (respiratory) contained proportionately more people who were obese (31.6%, vs 27.0% in Cluster L1), more smokers (12.9% vs 12.2%) and more people who rated their symptoms as ‘severe’ (43.5% vs 27.4%). Prevalence of all surveyed comorbidities was higher in Cluster L2 than Cluster L1, and the prevalence of comorbidities was higher in the symptomatic clusters than in those who did not experience persistent symptoms at 12 weeks.

| Variable                                     | Category          | Asymptomatic at 12 weeks   | Cluster L1 (“tiredness”)   | Cluster L2 (“respiratory”) | Total /mean (SD) |
|----------------------------------------------|-------------------|----------------------------|----------------------------|----------------------------|------------------|
| All participants                             | All participants  | 33069 (100%, [100-100])    | 15799 (100%, [100-100])    | 4441 (100%, [99.9-100])    | 53309            |
| Sex                                          | Women             | 17834 (53.9%, [53.4-54.5]) | 10041 (63.6%, [62.8-64.3]) | 2794 (62.9%, [61.5-64.3])  | 30669            |
|                                              | Men               | 15234 (46.1%, [45.5-46.6]) | 5758 (36.4%, [35.7-37.2])  | 1647 (37.1%, [35.7-38.5])  | 22639            |
| Age group                                    | 18-24             | 2440 (7.4%, [7.1-7.7])     | 917 (5.8%, [5.5-6.2])      | 185 (4.2%, [3.6-4.8])      | 3542             |
|                                              | 25-34             | 5911 (17.9%, [17.5-18.3])  | 2108 (13.3%, [12.8-13.9])  | 547 (12.3%, [11.4-13.3])   | 8566             |
|                                              | 35-44             | 7478 (22.6%, [22.2-23.1])  | 2891 (18.3%, [17.7-18.9])  | 836 (18.8%, [17.7-20])     | 11205            |
|                                              | 45-54             | 7476 (22.6%, [22.2-23.1])  | 3687 (23.3%, [22.7-24])    | 1108 (24.9%, [23.7-26.2])  | 12271            |
|                                              | 55-64             | 6021 (18.2%, [17.8-18.6])  | 3492 (22.1%, [21.5-22.8])  | 1035 (23.3%, [22.1-24.6])  | 10548            |
|                                              | 65-74             | 2971 (9%, [8.7-9.3])       | 2020 (12.8%, [12.3-13.3])  | 544 (12.2%, [11.3-13.2])   | 5535             |
|                                              | 74+               | 772 (2.3%, [2.2-2.5])      | 684 (4.3%, [4-4.7])        | 186 (4.2%, [3.6-4.8])      | 1642             |
| Ethnicity                                    | Asian             | 1337 (4.1%, [3.9-4.3])     | 464 (3%, [2.7-3.2])        | 98 (2.2%, [1.8-2.7])       | 1899             |
|                                              | Black             | 319 (1%, [0.9-1.1])        | 168 (1.1%, [0.9-1.2])      | 34 (0.8%, [0.6-1.1])       | 521              |
|                                              | Mixed             | 524 (1.6%, [1.5-1.7])      | 262 (1.7%, [1.5-1.9])      | 92 (2.1%, [1.7-2.6])       | 878              |
|                                              | Other             | 354 (1.1%, [1-1.2])        | 164 (1%, [0.9-1.2])        | 42 (1%, [0.7-1.3])         | 560              |
|                                              | White             | 30275 (92.3%, [92-92.6])   | 14614 (93.2%, [92.8-93.6]) | 4146 (94%, [93.2-94.6])    | 49035            |
| ADIPOSITY                                    | Normal weight     | 11981 (41.2%, [40.6-41.8]) | 5071 (36.5%, [35.7-37.3])  | 1241 (31.8%, [30.4-33.3])  | 18293            |
|                                              | Obese             | 6245 (21.5%, [21-21.9])    | 3756 (27%, [26.3-27.8])    | 1234 (31.6%, [30.2-33.1])  | 11235            |
|                                              | Overweight        | 10476 (36%, [35.5-36.6])   | 4898 (35.3%, [34.5-36.1])  | 1365 (35%, [33.5-36.5])    | 16739            |
|                                              | Underweight       | 381 (1.3%, [1.2-1.4])      | 166 (1.2%, [1-1.4])        | 63 (1.6%, [1.3-2.1])       | 610              |
| Healthcare or care home worker               | Yes               | 2109 (8.5%, [8.2-8.9])     | 1260 (11.8%, [11.2-12.4])  | 358 (12.2%, [11.1-13.4])   | 3727             |
| Index of multiple deprivation (IMD) quintile | 1 - most deprived | 3244 (9.8%, [9.5-10.1])    | 1845 (11.7%, [11.2-12.2])  | 586 (13.2%, [12.2-14.2])   | 5675             |
|                                              | 2                 | 5463 (16.5%, [16.1-16.9])  | 2739 (17.3%, [16.8-17.9])  | 794 (17.9%, [16.8-19])     | 8996             |
|                                              | 3                 | 7123 (21.5%, [21.1-22])    | 3504 (22.2%, [21.5-22.8])  | 1008 (22.7%, [21.5-24])    | 11635            |

|                                      |                                                                  |                            |                            |                           |       |
|--------------------------------------|------------------------------------------------------------------|----------------------------|----------------------------|---------------------------|-------|
|                                      | 4                                                                | 8004 (24.2%, [23.7-24.7])  | 3790 (24%, [23.3-24.7])    | 1000 (22.5%, [21.3-23.8]) | 12794 |
|                                      | 5 - least deprived                                               | 9235 (27.9%, [27.4-28.4])  | 3921 (24.8%, [24.2-25.5])  | 1053 (23.7%, [22.5-25])   | 14209 |
| Current smoker                       | Current cigarette smoker                                         | 3430 (10.4%, [10-10.7])    | 1935 (12.2%, [11.7-12.8])  | 573 (12.9%, [11.9-13.9])  | 5938  |
|                                      | Not current cigarette smoker                                     | 29321 (88.7%, [88.3-89])   | 13731 (86.9%, [86.4-87.4]) | 3826 (86.2%, [85.1-87.1]) | 46878 |
| Current vaper                        | Prefer not to say                                                | 318 (1%, [0.9-1.1])        | 133 (0.8%, [0.7-1])        | 42 (0.9%, [0.7-1.3])      | 493   |
|                                      | Current vaper                                                    | 2042 (6.2%, [5.9-6.4])     | 1083 (6.9%, [6.5-7.3])     | 328 (7.4%, [6.7-8.2])     | 3453  |
|                                      | Not current vaper                                                | 30831 (93.2%, [93-93.5])   | 14639 (92.7%, [92.2-93.1]) | 4086 (92%, [91.2-92.8])   | 49556 |
| Severity of COVID symptoms           | Prefer not to say                                                | 196 (0.6%, [0.5-0.7])      | 77 (0.5%, [0.4-0.6])       | 27 (0.6%, [0.4-0.9])      | 300   |
|                                      | Mild symptoms                                                    | 11133 (33.7%, [33.2-34.2]) | 3345 (21.2%, [20.5-21.8])  | 476 (10.7%, [9.8-11.7])   | 14954 |
|                                      | Moderate symptoms                                                | 16378 (49.5%, [49-50.1])   | 8130 (51.5%, [50.7-52.2])  | 2034 (45.8%, [44.3-47.3]) | 26542 |
|                                      | Severe symptoms                                                  | 5558 (16.8%, [16.4-17.2])  | 4324 (27.4%, [26.7-28.1])  | 1931 (43.5%, [42.0-44.9]) | 11813 |
| Treatment sought/ received for COVID | Hospital admission                                               | 149 (0.5%, [0.4-0.6])      | 163 (1.1%, [0.9-1.3])      | 122 (2.9%, [2.5-3.5])     | 434   |
|                                      | No medical attention sought                                      | 22687 (72%, [71.5-72.5])   | 8811 (59.2%, [58.4-59.9])  | 1758 (42.3%, [40.8-43.8]) | 33256 |
|                                      | Sought medical attention from pharmacist / by phone (NHS 111/GP) | 6355 (20.2%, [19.7-20.6])  | 4525 (30.4%, [29.6-31.1])  | 1674 (40.3%, [38.8-41.7]) | 12554 |
|                                      | Visited GP/walk-in centre/A&E                                    | 2324 (7.4%, [7.1-7.7])     | 1397 (9.4%, [8.9-9.9])     | 605 (14.5%, [13.5-15.7])  | 4326  |
| Gross household income               | >150,000                                                         | 1516 (6.8%, [6.5-7.2])     | 509 (4.9%, [4.5-5.3])      | 109 (3.7%, [3.1-4.4])     | 2134  |
|                                      | 0-14,999                                                         | 1545 (7%, [6.6-7.3])       | 1222 (11.7%, [11.1-12.3])  | 405 (13.8%, [12.6-15.1])  | 3172  |
|                                      | 15,000-49,999                                                    | 8858 (39.9%, [39.2-40.5])  | 4743 (45.4%, [44.5-46.4])  | 1380 (46.9%, [45.1-48.7]) | 14981 |
|                                      | 50,000-149,999                                                   | 10296 (46.3%, [45.7-47])   | 3968 (38%, [37.1-38.9])    | 1049 (35.6%, [33.9-37.4]) | 15313 |
| Comorbidities                        | Organ transplant recipient                                       | 26 (0.1%, [0.1-0.1])       | 14 (0.1%, [0.1-0.1])       | 9 (0.2%, [0.1-0.4])       | 49    |
|                                      | Diabetes (type I or II)                                          | 1171 (3.5%, [3.3-3.7])     | 843 (5.3%, [5-5.7])        | 258 (5.8%, [5.2-6.5])     | 2272  |
|                                      | Heart disease or heart problems                                  | 914 (2.8%, [2.6-2.9])      | 777 (4.9%, [4.6-5.3])      | 288 (6.5%, [5.8-7.2])     | 1979  |
|                                      | Hypertension (high blood pressure)                               | 3004 (9.1%, [8.8-9.4])     | 2165 (13.7%, [13.2-14.2])  | 644 (14.5%, [13.5-15.6])  | 5813  |
|                                      | Kidney disease                                                   | 146 (0.4%, [0.4-0.5])      | 106 (0.7%, [0.6-0.8])      | 47 (1.1%, [0.8-1.4])      | 299   |
|                                      | Liver disease                                                    | 158 (0.5%, [0.4-0.6])      | 159 (1%, [0.9-1.2])        | 54 (1.2%, [0.9-1.6])      | 371   |
|                                      | Anaemia                                                          | 87 (0.3%, [0.2-0.3])       | 84 (0.5%, [0.4-0.7])       | 32 (0.7%, [0.5-1])        | 203   |
|                                      | Asthma                                                           | 381 (1.2%, [1-1.3])        | 432 (2.7%, [2.5-3])        | 145 (3.3%, [2.8-3.8])     | 958   |
|                                      | Other lung condition                                             | 3264 (9.9%, [9.6-10.2])    | 2001 (12.7%, [12.2-13.2])  | 1113 (25.1%, [23.8-26.4]) | 6378  |
|                                      | Cancer                                                           | 347 (1%, [0.9-1.2])        | 435 (2.8%, [2.5-3])        | 362 (8.2%, [7.4-9])       | 1144  |
|                                      | Condition affecting the brain and nerves                         | 284 (0.9%, [0.8-1])        | 208 (1.3%, [1.2-1.5])      | 65 (1.5%, [1.2-1.9])      | 557   |
|                                      | A weakened immune system/reduced ability to deal with infections | 220 (0.7%, [0.6-0.8])      | 211 (1.3%, [1.2-1.5])      | 65 (1.5%, [1.2-1.9])      | 496   |

|                      |                           |                         |                          |      |
|----------------------|---------------------------|-------------------------|--------------------------|------|
| Depression           | 876 (2.6%, [2.5-2.8])     | 917 (5.8%, [5.5-6.2])   | 364 (8.2%, [7.4-9])      | 2157 |
| Anxiety              | 2139 (6.5%, [6.2-6.7])    | 2057 (13%, [12.5-13.6]) | 695 (15.6%, [14.6-16.7]) | 4891 |
| Psychiatric disorder | 3504 (10.6%, [10.3-10.9]) | 2940 (18.6%, [18-19.2]) | 998 (22.5%, [21.3-23.7]) | 7442 |
| None of these        | 189 (0.6%, [0.5-0.7])     | 188 (1.2%, [1-1.4])     | 76 (1.7%, [1.4-2.1])     | 453  |

**Table S11 Summary of persistent symptom prevalence among LFIA-positive individuals.**

Numbers and proportions of participants who reported one or more symptoms (from a list of 29 surveyed symptoms) of COVID-19 at i) time of symptom onset and ii) 12 weeks post symptom onset, among a subset of 14,704 symptomatic participants who tested positive for antibodies by lateral flow immunoassay, and for whom we have 12 weeks' observation time and complete data.

| Variable         | Category | Symptomatic at infection | Number symptomatic at 12 weeks | % symptomatic at 12 weeks |
|------------------|----------|--------------------------|--------------------------------|---------------------------|
| All participants | -        | 14704                    | 6232                           | 42.4%, [41.6-43.2]        |
| Sex              | Female   | 8546                     | 4022                           | 47.1%, [46-48.1]          |
|                  | Male     | 6158                     | 2210                           | 35.9%, [34.7-37.1]        |
| Age group        | 18-24    | 1210                     | 384                            | 31.7%, [29.2-34.4]        |
|                  | 25-34    | 2410                     | 841                            | 34.9%, [33-36.8]          |
|                  | 35-44    | 2615                     | 1011                           | 38.7%, [36.8-40.5]        |
|                  | 45-54    | 3419                     | 1552                           | 45.4%, [43.7-47.1]        |
|                  | 55-64    | 3180                     | 1502                           | 47.2%, [45.5-49]          |
|                  | 65-74    | 1395                     | 691                            | 49.5%, [46.9-52.2]        |
|                  | 74+      | 475                      | 251                            | 52.8%, [48.3-57.3]        |
| Ethnicity        | Asian    | 877                      | 301                            | 34.3%, [31.3-37.5]        |
|                  | Black    | 215                      | 93                             | 43.3%, [36.8-49.9]        |
|                  | Mixed    | 241                      | 94                             | 39%, [33.1-45.3]          |
|                  | Other    | 223                      | 87                             | 39%, [32.8-45.5]          |
|                  | White    | 13024                    | 5606                           | 43%, [42.2-43.9]          |

**Table S12 Symptom prevalence in PCR-positive individuals in REACT-1.**

Proportion of PCR-positive respondents reporting one or more of 26 symptoms up to 7 days before the PCR test, among 7,204 total PCR-positive adults (18+) surveyed in rounds 2 to 14 of REACT-1, between 20 June 2020 and 27 September 2021. A decline in the proportion of respondents reporting symptoms is observed in participants in the oldest age groups.

| <b>Variable</b> | <b>Category</b> | <b>Total PCR positive</b> | <b>Asymptomatic</b>       | <b>Symptomatic</b>       |
|-----------------|-----------------|---------------------------|---------------------------|--------------------------|
| Age             | 18-24           | 596                       | 344 (57.7%, [53.7-61.6])  | 252 (42.3%, [38.4-46.3]) |
| Age             | 25-34           | 928                       | 484 (52.2%, [48.9-55.4])  | 444 (47.8%, [44.6-51.1]) |
| Age             | 35-44           | 1196                      | 636 (53.2%, [50.3-56])    | 560 (46.8%, [44-49.7])   |
| Age             | 45-54           | 1556                      | 816 (52.4%, [50-54.9])    | 740 (47.6%, [45.1-50])   |
| Age             | 55-64           | 1480                      | 825 (55.7%, [53.2-58.3])  | 655 (44.3%, [41.7-46.8]) |
| Age             | 65+             | 1448                      | 1007 (69.5%, [67.1-71.9]) | 441 (30.5%, [28.1-32.9]) |

### Figure S1 Modelled probability of symptomatic infection and persistent symptoms, by age.

Plots showing (top row) modelled probability of persistent symptoms at 12 weeks as a function of age and sex, using generalised additive models with splines on age and interactions between age and sex (top row), and (bottom row) weighted prevalence of persistent symptoms at 12 weeks. From left to right, plots show (i) probability of experiencing COVID-19 symptoms in the population (n=508,707 observations), (ii) probability of experiencing persistent symptoms at 12 weeks in the population, and (iii) probability of experiencing persistent symptoms at 12 weeks, conditional on symptomatic infection (n=71,642 observations for whom we had 150 days' observation time). Conditional on symptomatic infection (likelihood of which decreases after age 50, see central panels), risk of persistent symptoms increases linearly with age (right panels).

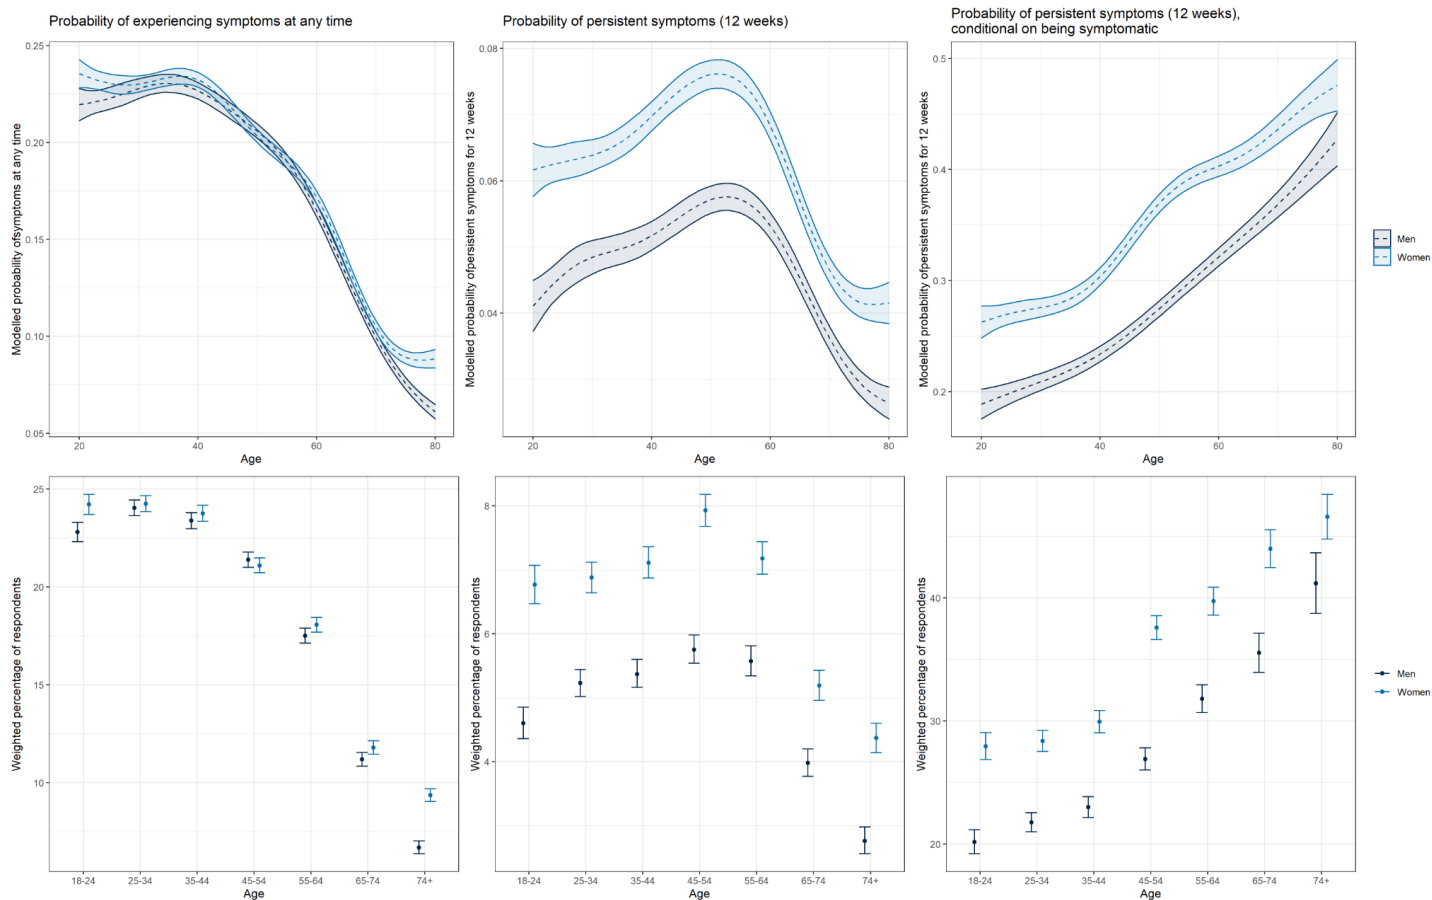

## Figure S2 Modelling of persistent symptoms as a function of biological and demographic variables (round 6 replication).

Results of replication analysis in round 6 of REACT2 (data collected between 12 and 25 May, 2021. N=13,170 observations, all self-reporting previous symptomatic COVID-19). (A) Logistic regression models with one or more symptoms at 12 weeks (y/n) as the binary outcome variable, both unadjusted and adjusted for sex and age; (B) Mean contribution to area under the curve (AUC) that each variable makes to a multivariable boosted tree model; (C) modelled probability of persistent symptoms at 12 weeks as a function of age and sex, using generalised additive models with splines on age and interactions between age and sex. The results are consistent with results from the main study population (Figure 2): Age, sex, adiposity and prior hospitalisation with COVID-19 are the strongest predictors of persistent symptoms in multivariable modelling, while Asian ethnicity is associated with a lower risk of persistent symptoms at 12 weeks. Current smoker status, household income, healthcare/care home worker status and deprivation were not selected in multivariable variable selection in round 6 but were selected in the main analysis in rounds 3–5 (Figure 2). Box plots in panel B show median, first and third quartiles; whiskers indicate 1.5 \* the interquartile range; data beyond this range are plotted as points.

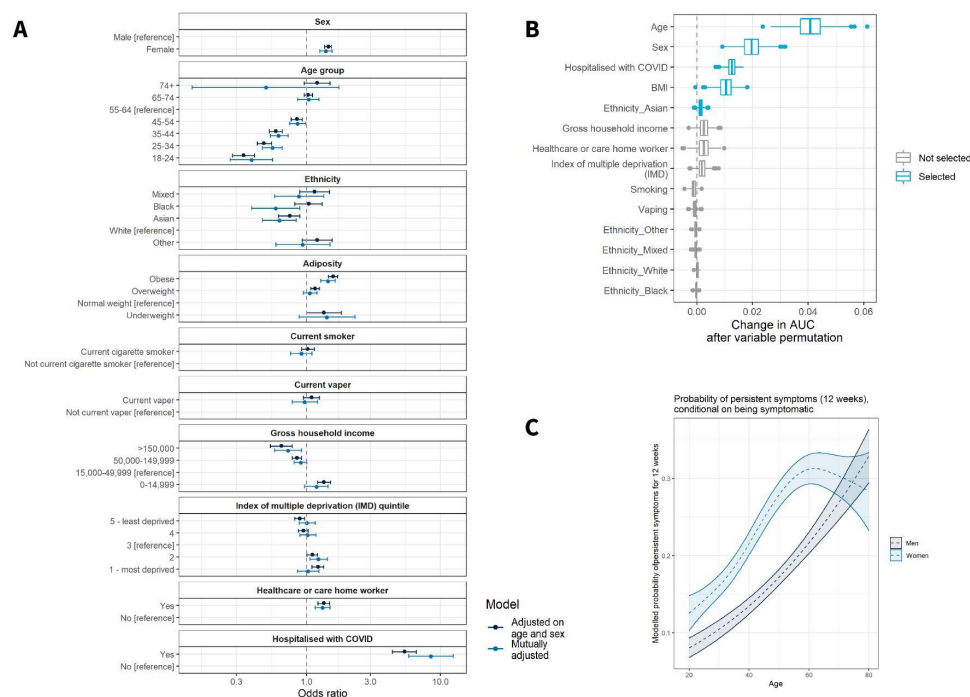

**Figure S3 Silhouette plot showing average silhouette width for 2 to 10 clusters.**

Clustering on symptoms at 12 weeks after initial symptom onset. The optimal number of clusters by this metric was 2.

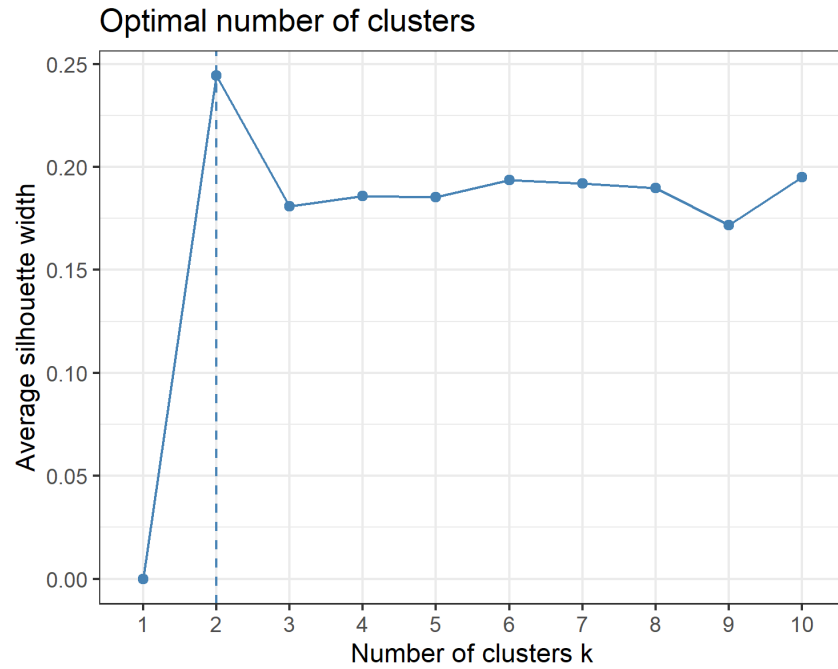



**Figure S4 Pairwise co-occurrence heatmaps of symptoms at 12 weeks after symptom onset, by cluster.** Cluster L1 (left) and Cluster L2 (right), in rounds 3–5. Deeper blue colour indicates that more people had both paired symptoms at 12 weeks post symptom onset; bar plots indicate marginal counts of participants with each symptom at 12 weeks post symptom onset.

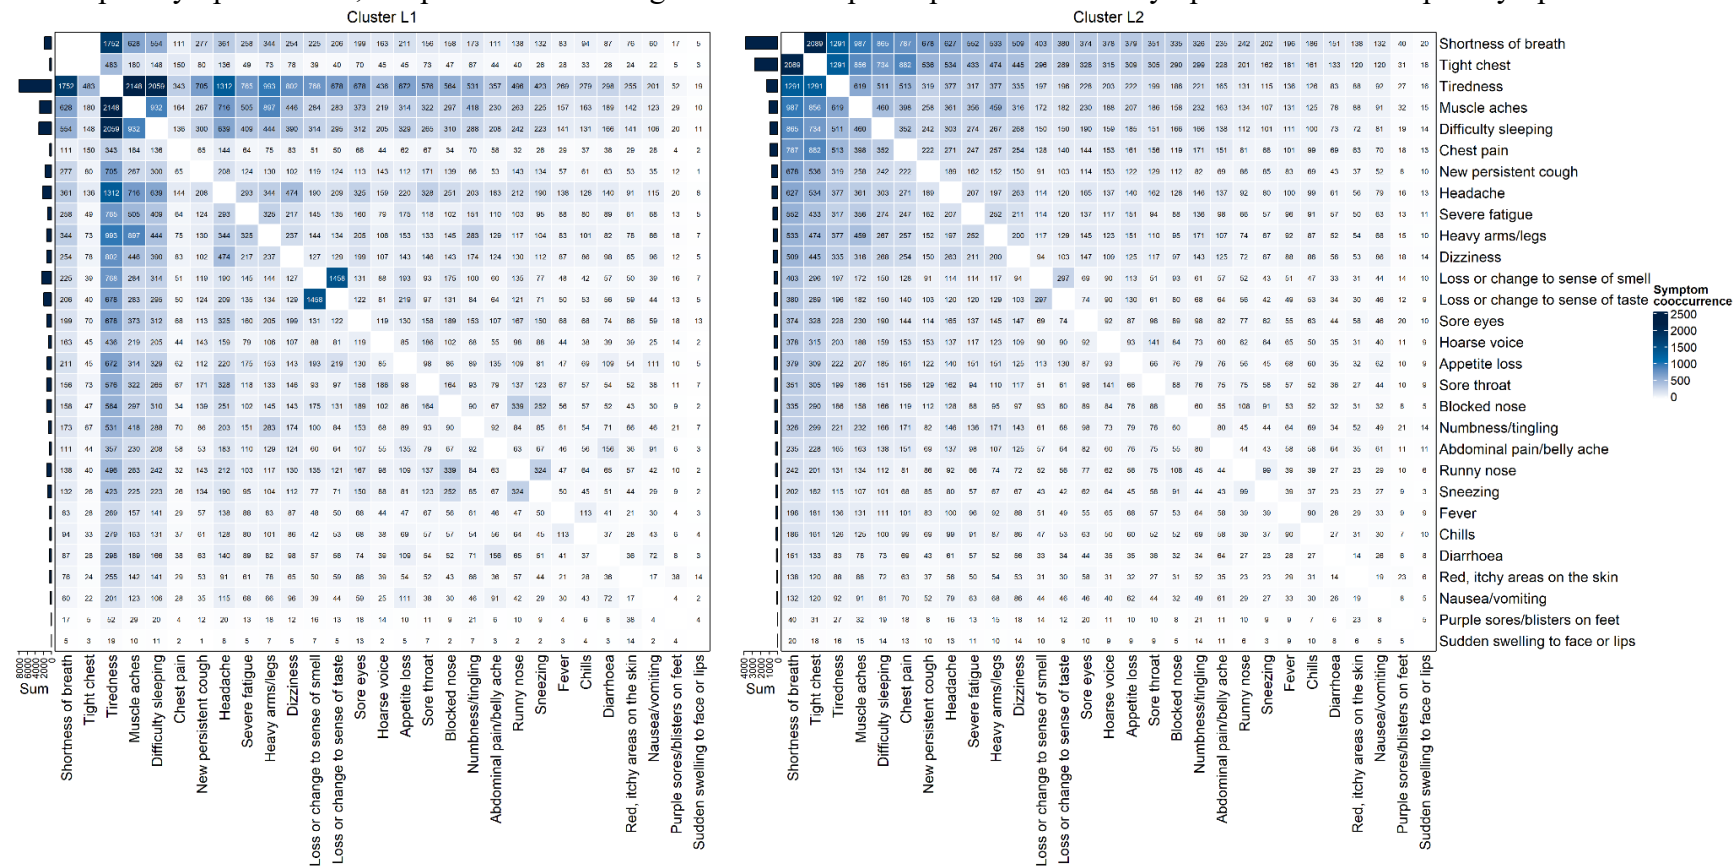

### Figure S5 Visualisation of cluster separation and symptom contribution, using MCA.

Panel plot visualising cluster membership using multiple correspondence analysis (MCA) to project categorical symptom data into new continuous components (dimensions). Bar plots show the contribution of the top 10 variables (symptoms) to the displayed dimensions. The medoids (representative observations that form the cluster centres) are marked in the scatter plot.

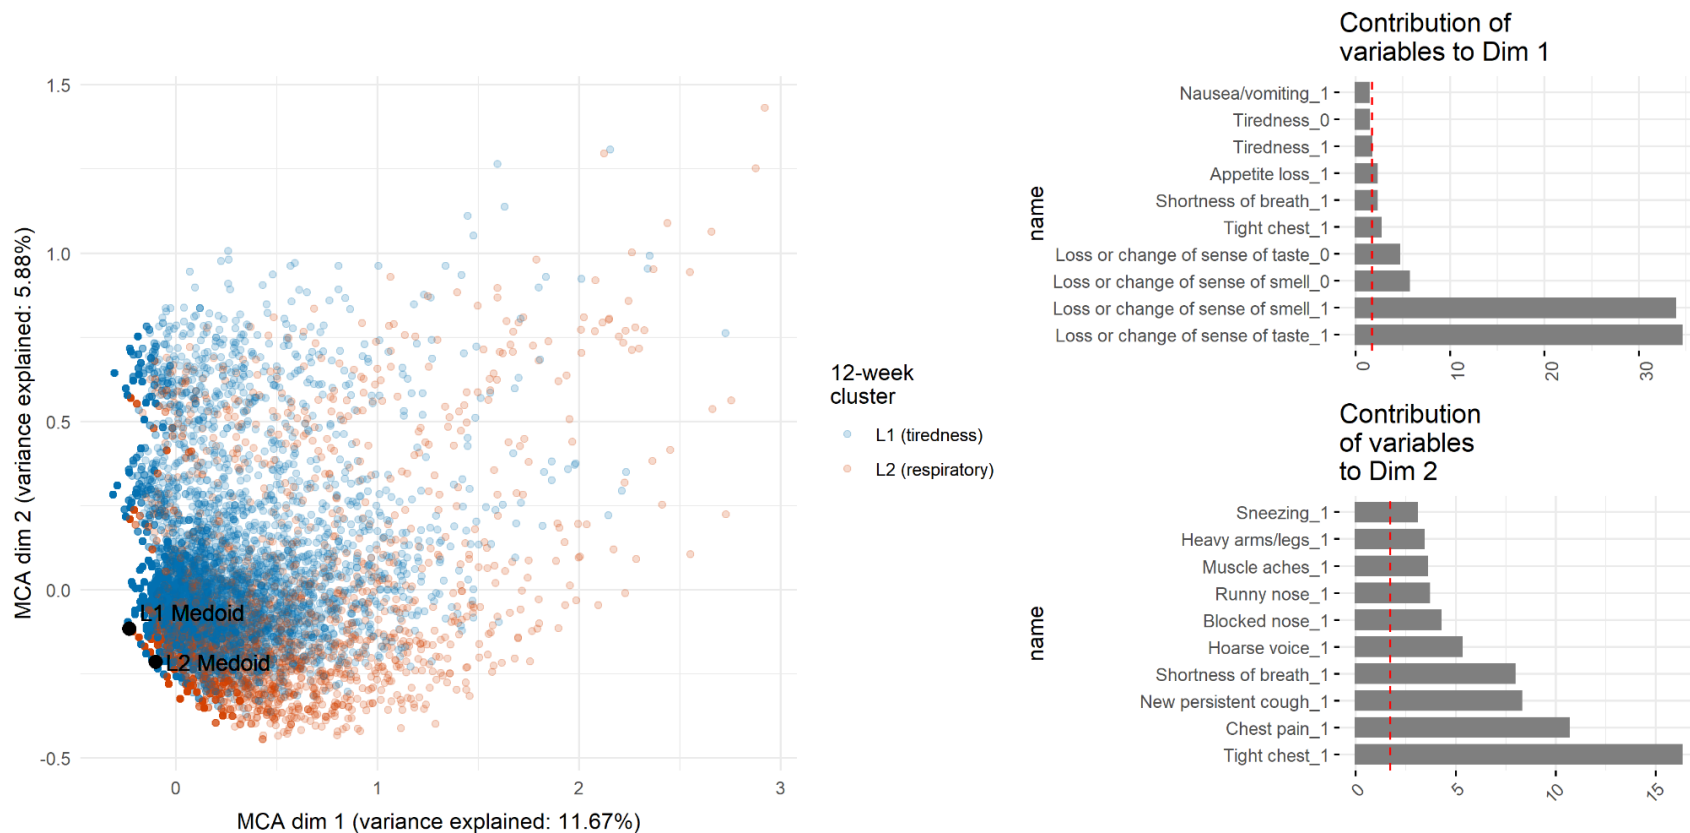

### Figure S6 Clustering results (round 6 replication).

Results of clustering on symptom profile at 12 weeks in (A) rounds 3–5, and (B) round 6, using 27 symptoms (as 23 symptom groups) that were common to rounds 3–5 and round 6. CLARA (partitioning around medoids) algorithm was used with the number of clusters constrained to two. Asterisks indicate symptoms that were grouped in round 6. Chills and heavy arms/legs were not surveyed in round 6. In both populations, the clustering identifies one cluster characterised by shortness of breath, accompanied by higher prevalence of tight/heavy chest/ chest pain.

#### A Rounds 3–5

(reclustered using updated symptom groupings)

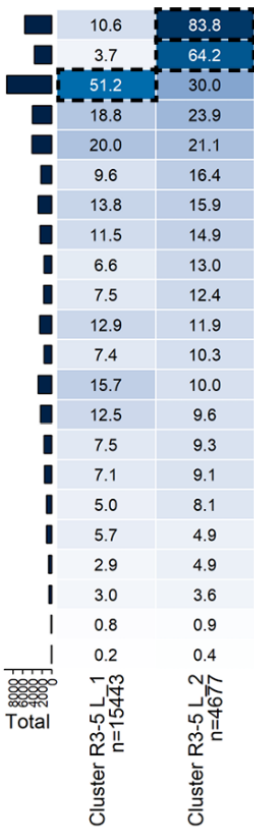

#### B Round 6

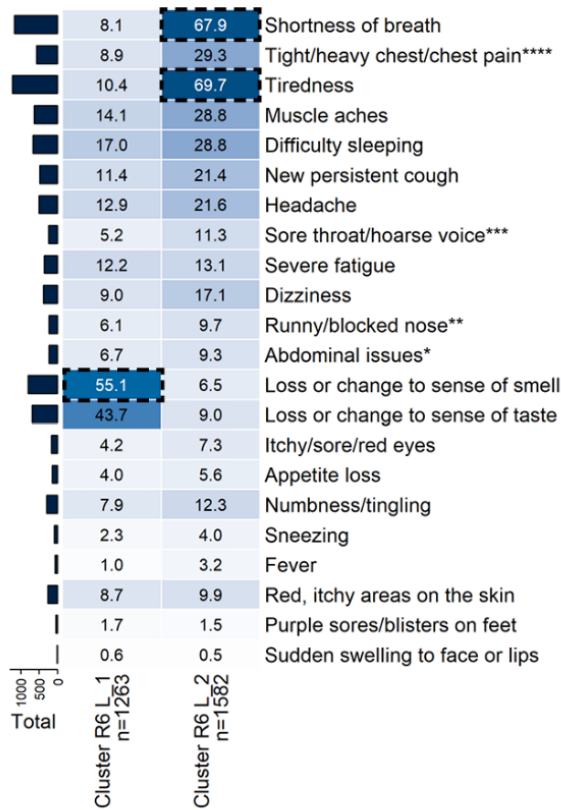

Cluster medoid symptoms

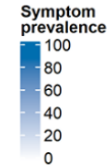

### Figure S7 Logistic modelling of PCR-positivity as a function of symptoms experienced.

Results of logistic model with self-reported PCR positivity as the binary outcome variable, and the 29 surveyed symptoms as binary independent variables, among a 30% variable selection holdout data set (n=22,847 observations). The 15 variables that were identified as positively predictive of PCR positivity (shown in bold colours) were taken forward as a sensitivity analysis of prevalence of persistent symptoms beyond 12 weeks, and as outcome variables in logistic regression of risk factors for persistence, among this reduced symptom set. Error bars indicate 95% confidence intervals based on the standard error of the regression coefficient.

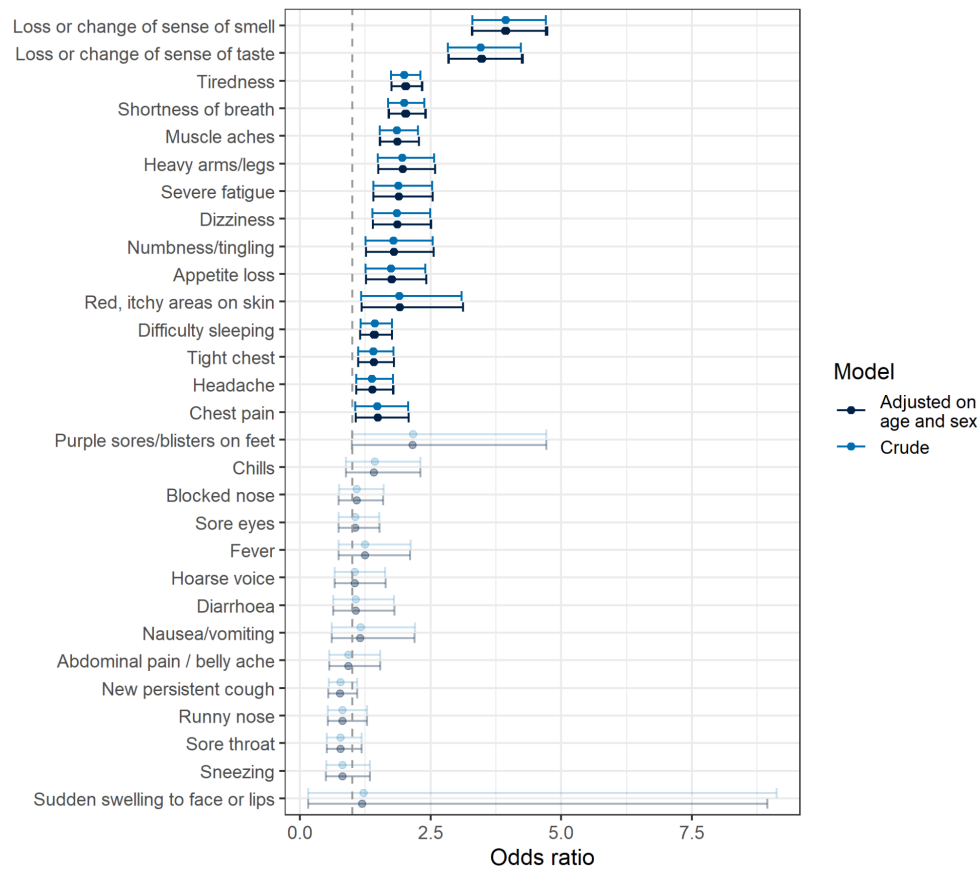

### Figure S8 Modelling of persistent symptoms as a function of biological and demographic variables (using 15-symptom subset).

Plots showing the results of predictive modelling, with one or more of a subset of 15 symptoms at 12 weeks (y/n) as the binary outcome variable (n=53,508 observations). Left panel shows odds ratios from logistic regression models, both age-sex and mutually adjusted. Error bars indicate 95% confidence intervals based on the standard error of the regression coefficient. Right panel shows the mean contribution in area under the curve (AUC) that each variable makes to a multivariable boosted tree model, derived using variable permutation. Age, sex, adiposity, current smoker status and gross household income are the strongest predictors of persistent symptoms in multivariable modelling, while Asian ethnicity is associated with a lower risk of persistent symptoms at 12 weeks. Box plots in panel B show median, first and third quartiles; whiskers indicate 1.5 \* the interquartile range; data beyond this range are plotted as points.

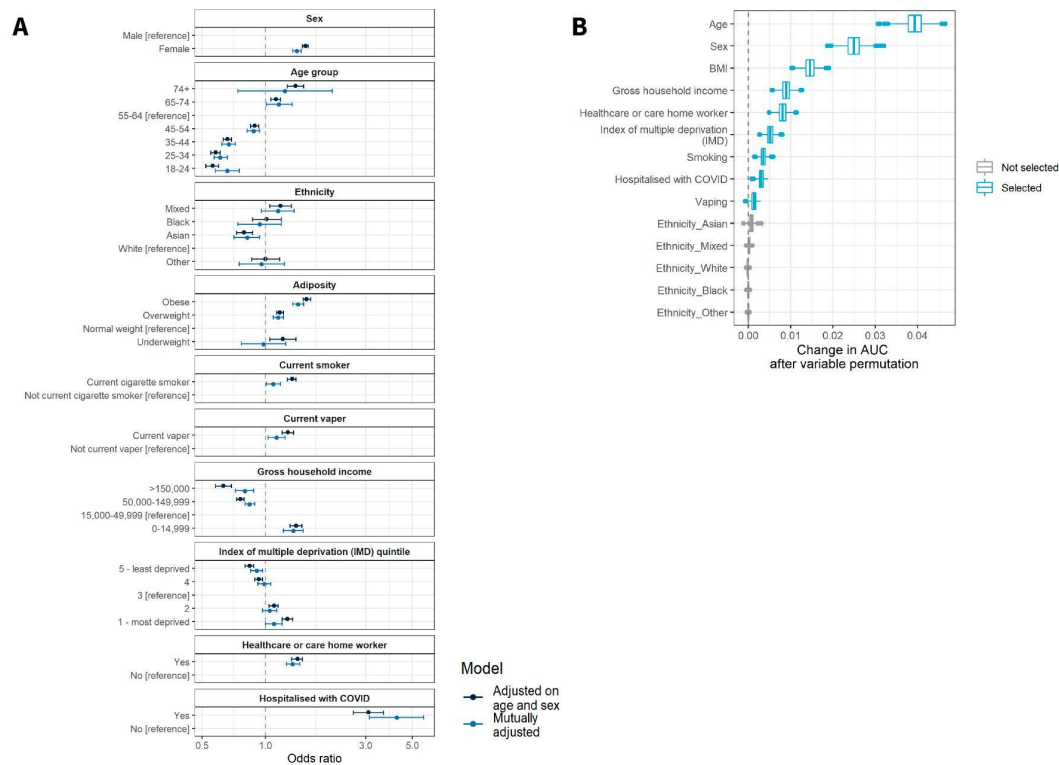

### Figure S9 Clustering results (with differing distance metrics).

Results of clustering on symptom profile at 12 weeks in rounds 3–5, using the same algorithm and approach as in the main analysis but replacing Hamming distance with (A) Dice distance and (B) Jaccard distance. Plot (C) shows the average silhouette width across clusters at a range of numbers of clusters using Dice, Jaccard and Hamming distance. Plot (D) shows the cluster membership overlap between the sensitivity analyses (Dice/Jaccard) and the main analysis (Hamming). Two-clusters with Hamming distance (presented in main analysis) created the best clusters according to the silhouette width metric; Dice and Jaccard distance with 5 and 6 clusters respectively each identified two clusters with shortness of breath and other respiratory symptoms (A2 and A5 in both), which in each case included nearly all the observations from the ‘respiratory’ cluster L2 from the main analysis.

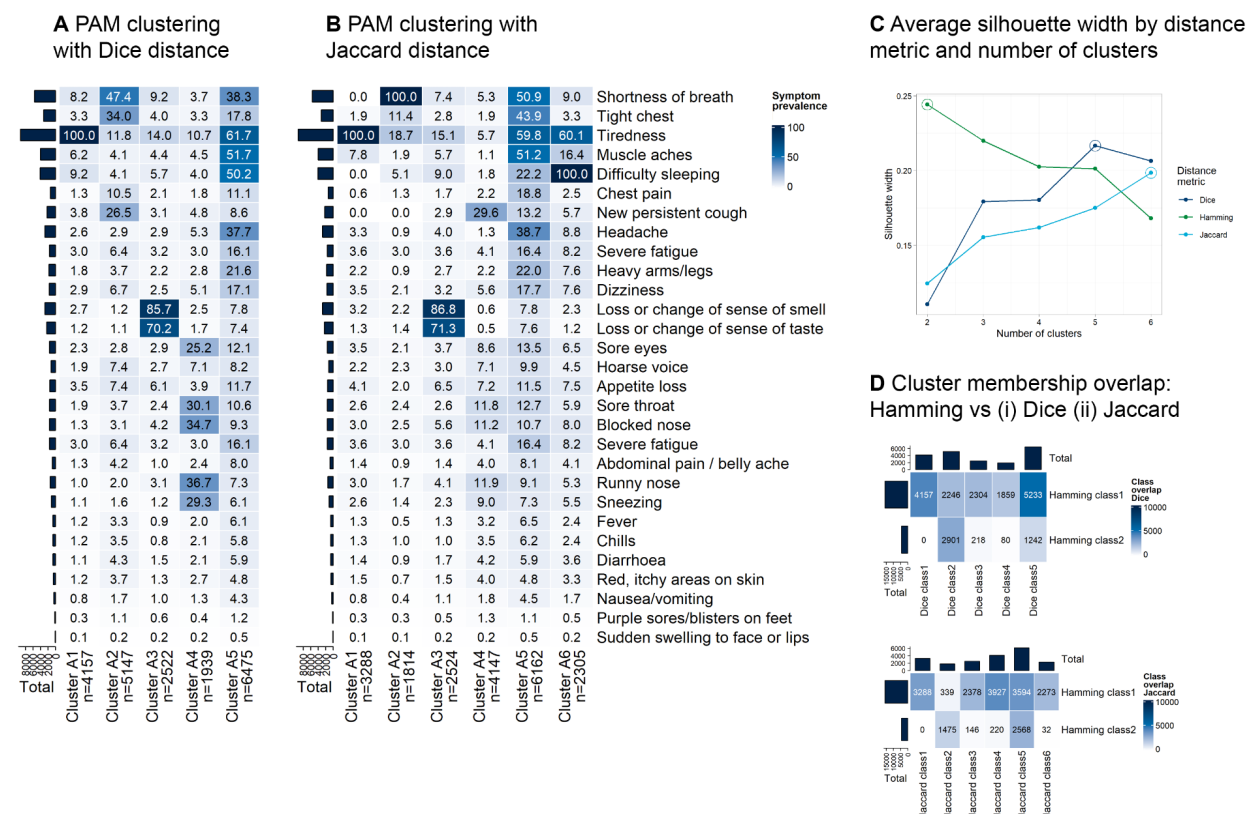

**Figure S10 Latent Class Analysis results.**

Results of Latent Class Analysis (LCA) on symptom profile at 12 weeks in rounds 3–5, showing (A) symptom prevalence across classes in the two-class model, and (B) average posterior probability across a range of models with different numbers of classes. The two-class model is shown to be optimal. Similar to the main clustering analysis, LCA identifies one larger group in which tiredness is the predominant symptom and one smaller group with multiple symptoms including high prevalence of respiratory symptoms.

**A** Latent Class Analysis:  
symptom prevalence

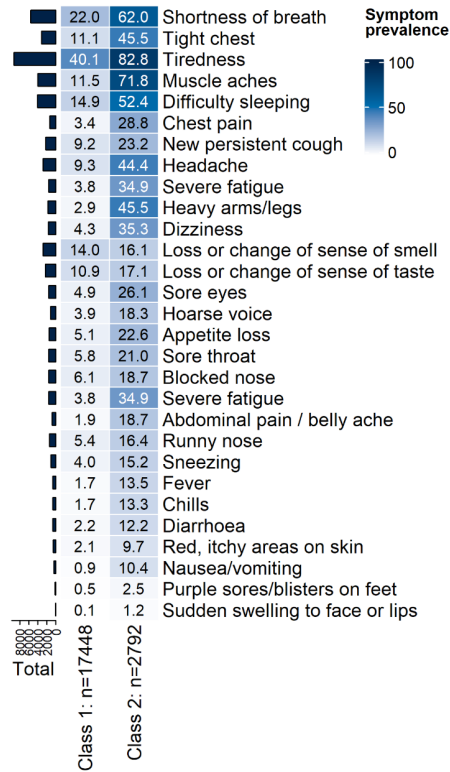

**B** Latent Class Analysis:  
Average posterior probability by  
number of classes in model

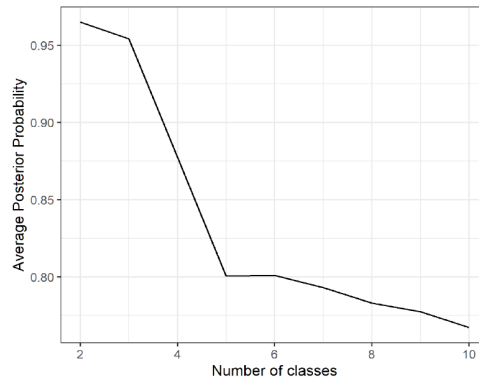

**Figure S11 Prevalence of symptoms persisting for 11 or more days in 1,879,842 PCR-negative respondents to REACT-1.** Data collected between July 2020 and September 2021 (rounds 2–14). Average weighted prevalence of 11+ days persistent symptoms was 3.06% (3.04,3.09) across rounds 2–14 of REACT-1. Error bars indicate 95% binomial confidence intervals of the prevalence.

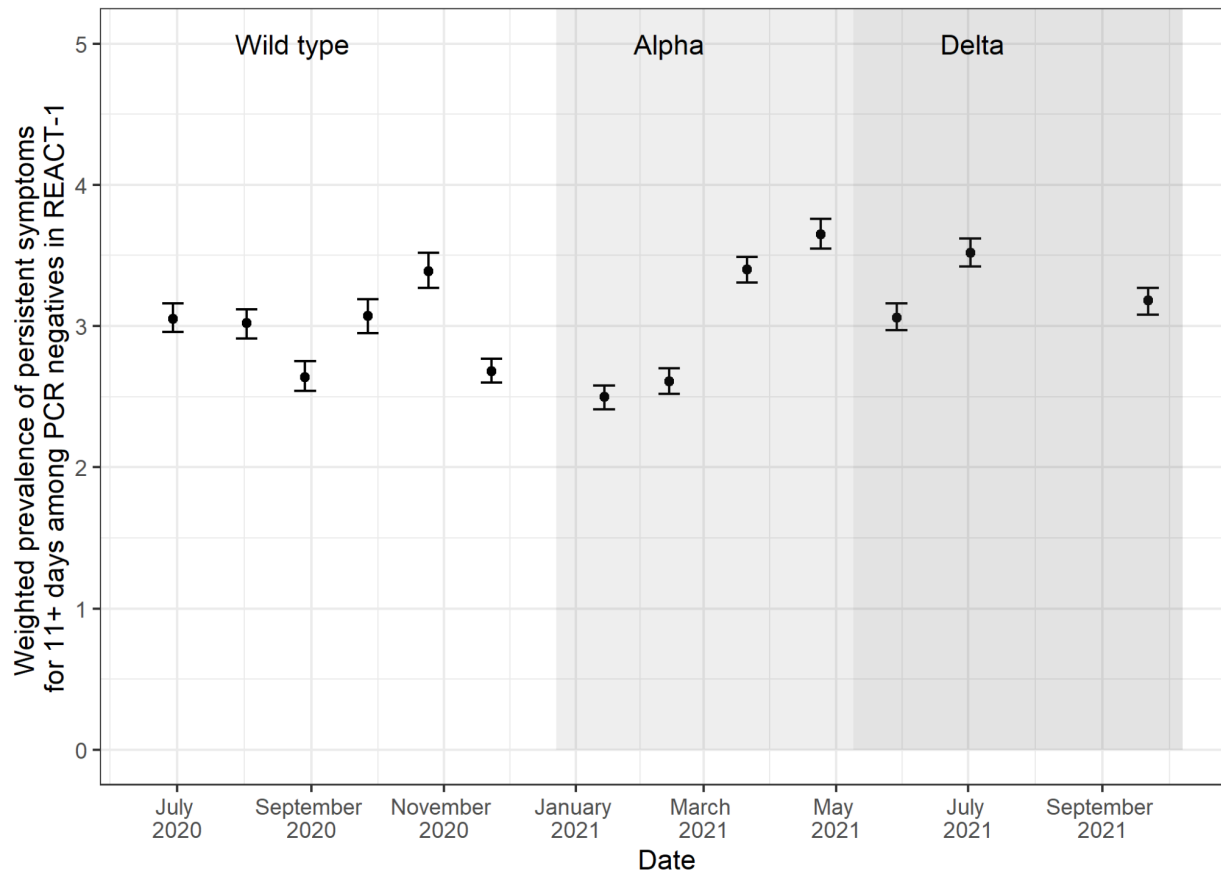



### Figure S12 Analysis of the free text responses to COVID-19 symptom questions in REACT-2.

A total of 8,374 respondents left free-text responses, of whom 1,860 reported the described symptoms persisting for 12 weeks or more. From left to right, the panels show (i) analysis of symptoms occurring at time of symptom onset; (ii) analysis of symptoms occurring at 4 weeks after symptom onset, and (iii) analysis of symptoms occurring at 12 weeks after symptom onset. The top two rows of panels visualise within-response word co-occurrence, as networks (top panels) and simple bar plots of the top 20 most frequently co-occurring pairs of words (middle panels). The bottom row shows the most commonly occurring single words.

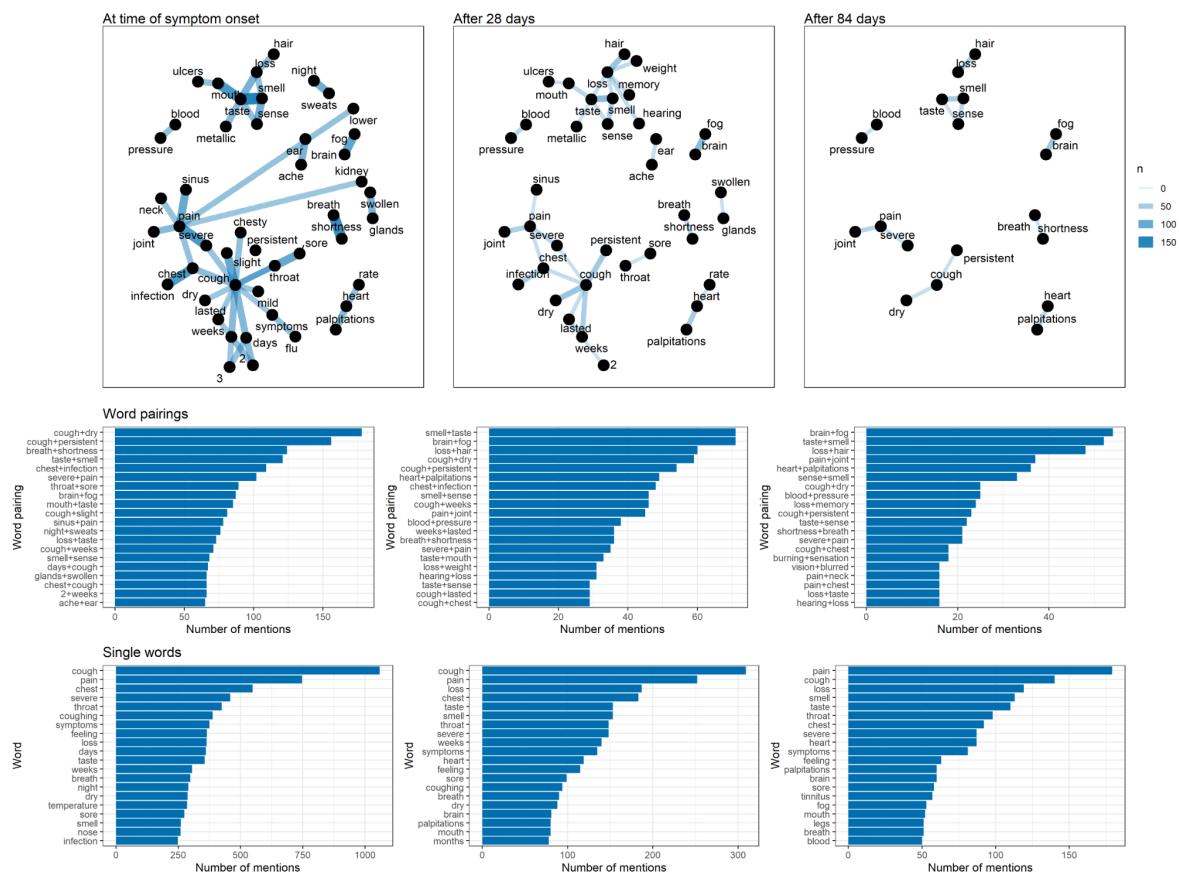

**Figure S13 Results of least absolute shrinkage and selection operator (LASSO) stability selection applied to predictors of persistent symptoms at 12 weeks among suspected or confirmed COVID-19.**

1000x LASSO models were constructed on 50% subsets of training data; the proportion of models in which each variable was selected represents a measure of variable importance, with a threshold for selection chosen using an internal calibration metric. Top panel shows averaged odds ratios for each predictor across all models in which the predictor was selected; middle panel shows the proportion of models in which each variable was selected; bottom panel shows the area under the curve (AUC) on unseen data of models constructed adding each variable in order of selection proportion, with weightings derived from the average odds ratio. Selected variables were consistent with the results from the main multivariable analysis: age, sex, adiposity, gross household income, hospitalisation with COVID-19, Index of Multiple Deprivation (IMD) and healthcare worker status were selected as predictors of persistent symptoms, conditional on symptomatic infection. Error bars on the top panel indicate the 95% confidence interval of the standard deviation of the distribution of log odds ratios. On the bottom panel error bars indicate 95% bootstrap confidence intervals based on 1,000x resamples.

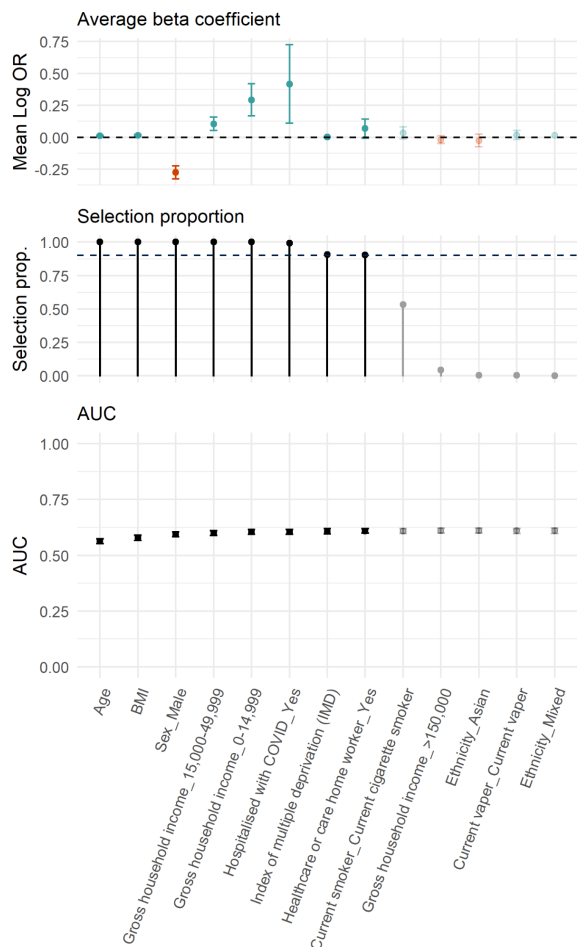

**Figure S14 Distribution of dates of self-reported COVID-19 illness.**

Plot shows the main study cohort (REACT-2 rounds 3–5, surveyed between October 2020 and February 2021) in dark blue and the validation cohort (REACT-2 round 6, surveyed in May 2021) in light blue; 82% of illnesses in the main study cohort, and 61% in the validation cohort, were ‘first wave’ infections, i.e. occurring before 1 July 2020.

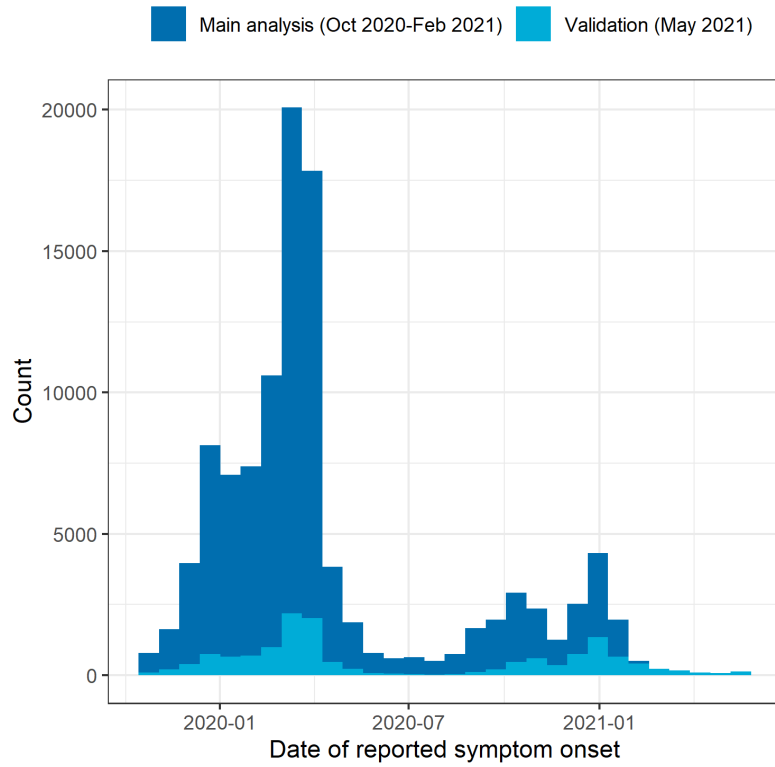

# Supplementary methods

## Modelling approaches

We took three broad modelling approaches:

1. Logistic regression models, to identify associations between putative risk factors and persistent symptoms at 12 weeks.
2. Variable ranking and selection using Gradient Boosting Models, to identify and rank a parsimonious set of predictors of persistent symptoms at 12 weeks.
3. Generalised Additive Modelling, to explicitly model the relationship between age and risk of persistent symptoms. Specifically, we wanted to see if the relationship was linear across all ages and if the risk gap between men and women persisted at all ages.

### *1. Logistic regression*

To identify associations between putative risk factors and persistent symptoms at 12 weeks, we constructed logistic regression models. The models were specified as follows:

Age-sex adjusted model:

$$y [\text{symptoms at 12 weeks } y/n] \sim \alpha + \beta_1[\text{risk factor}] + \beta_2 [\text{age}] + \beta_3[\text{sex}]$$

Mutually adjusted model:

$$y [\text{symptoms at 12 weeks } y/n] \sim \alpha + \beta_1[\text{risk factor}] + \beta X[\text{matrix of confounders}]$$

Age-sex adjusted and mutually adjusted odds ratios and 95% confidence intervals were reported.

### *2. Variable ranking and selection*

For variable selection, we used a multivariable gradient boosting model combined with variable permutation analysis. To capture possible non-linearities and interaction effects, a gradient boosted tree model was used. Catboost has been shown to outperform XGBoost and LightGBM in terms of accuracy and computational expense (<https://catboost.ai/#benchmark>) and so was selected for this analysis.

This variable selection approach was used in two analyses: 1) to identify a sparse set of predictors of persistent symptoms beyond 12 weeks (i.e. with any symptom  $y/n$  as the outcome and a set of biological and sociodemographic variables as predictors), and 2) to identify a sparse set of symptoms that were predictive of a positive LFIA test, for the sensitivity analysis.

First, a model was trained on 80% of the data. Overfitting was controlled by further splitting these data into a training pool and a validation pool. The model was fitted on the training pool, and after each round (each additional tree) performance was evaluated on the validation pool. Model training ceased once performance stopped improving on the validation pool. The objective function was logloss. Default settings were used for all other model hyperparameters.

Next, the model was used to predict the outcome variable in the 20% holdout data, and the AUC recorded.

Next, we permuted each variable in turn in the holdout data and ran the predictions again, recording the AUC. This process was repeated 1000x to obtain a distribution of AUCs for the model with each of the variables permuted. The proportion of permuted runs where the AUC was greater than the unpermuted prediction run was taken as a p-value that the variable was contributing to predictive accuracy. Variables whose proportion was below 5% ( $p < 0.05$ ) were selected and highlighted in Figure 2B.

As a complement to this multivariable modelling approach we used logistic least absolute shrinkage and selection operator (LASSO) models with stability selection. Briefly, 1000x LASSO models were constructed on 50% subsets of training data; the proportion of models in which each variable was selected represents a measure of variable importance, with a threshold for selection chosen using an internal calibration metric.

### 3. *Generalised additive models*

To explicitly model the relationship between age and risk of persistent symptoms we constructed generalised additive models with persistent symptoms at 12 weeks as the binary outcome variable. The model specification was:

$$g(y \text{ [symptoms at 12 weeks } y/n]) \sim \alpha + f_1[\text{age, sex}] + \beta_2 [\text{sex}]$$

... where  $g$  is a link function and  $f_i$  represents a smooth function (thin plate spline).

### **Clustering: detailed methodology**

Clustering was performed using the Clustering Large Applications (CLARA) extension to the Partitioning around Medoids (PAM) clustering algorithm. CLARA uses a sampling approach – taking a proportion of observations in a data set and applying the PAM algorithm to select the optimal medoids by minimising the distance between the medoids and cluster members. The clusters are then generalised to the full data set by assigning all observations to the nearest

medoid. We used a 50% data sample as the largest sample size that remained computationally feasible for the main analysis and bootstrap stability analysis.

In the main analysis, we used Hamming distance to quantify distance between observations, preferring it to e.g. the Jaccard/Dice metrics as it quantifies both positive and negative agreement in the distance denominator (while Jaccard and Dice only quantify positive agreement between vectors – i.e. where both participants have a symptom) and in this study we wanted to group respondents on the basis of both presence and absence of symptoms. The CLARA/PAM algorithm was used as it handles binary data and is computationally feasible, with findings and methods that are interpretable to non-experts. The identification of medoids as ‘typical’ observations, which PAM does, was also desirable as it aids interpretation of the clusters.

As a sensitivity analysis, we re-ran the clustering using the Dice and Jaccard distance metrics to examine how the clusters differ when the distance metric counts only positive agreement (i.e. when two people both have a symptom) in the numerator of the formula.

Where:

- a = {1,1} (both respondents have a symptom)
- b = {0,0} (neither respondents have a symptom)
- c = {1,0} (first respondent has symptom, second does not)
- d = {0,1} (second respondent has symptom, first does not)

Hamming distance

$$(a+b) / (a+b+c+d)$$

Dice distance

$$2a / (2a+c+d)$$

Jaccard distance

$$a / (a+c+d)$$

### **Latent Class Analysis (LCA)**

As a further sensitivity analysis, and to test the generalisability of the structure identified in clustering, we applied Latent Class Analysis to the symptom data at 12 weeks. Observations were assigned to the class with the highest posterior probability, and the classes were characterised in the same way as the clusters (heatmaps showing symptom prevalence by class).

## Replication analysis

We repeated our main analyses in data from round 6 of REACT-2, which was gathered between 12 and 25 May 2021. The question structure in round 6 was different to rounds 3–5 (see survey questions below) and there were some differences in the symptoms surveyed (see Table S13).

**Table S13 Details of symptoms surveyed in rounds 3–5 and in round 6 of REACT-2.** X indicates that the symptom was surveyed. Symptoms that were grouped in round 6 are indicated by XX.

| Symptom                           | Surveyed in rounds 3–5 | Surveyed in round 6               |
|-----------------------------------|------------------------|-----------------------------------|
| Chills                            | X                      |                                   |
| Heavy arms/legs                   | X                      |                                   |
| Nausea/vomiting                   | X                      | XX (Abdominal issues)             |
| Diarrhoea                         | X                      | XX (Abdominal issues)             |
| Abdominal pain/belly ache         | X                      | XX (Abdominal issues)             |
| Runny nose                        | X                      | XX (Runny/blocked nose)           |
| Blocked nose                      | X                      | XX (Runny/blocked nose)           |
| Sore throat                       | X                      | XX (Sore throat/hoarse voice)     |
| Hoarse voice                      | X                      | XX (Sore throat/hoarse voice)     |
| Tight chest                       | X                      | XX (Tight/heavy chest/chest pain) |
| Chest pain                        | X                      | XX (Tight/heavy chest/chest pain) |
| Appetite loss                     | X                      | X                                 |
| Sneezing                          | X                      | X                                 |
| Sore eyes                         | X                      | X                                 |
| Loss or change to sense of smell  | X                      | X                                 |
| Loss or change to sense of taste  | X                      | X                                 |
| Headache                          | X                      | X                                 |
| Dizziness                         | X                      | X                                 |
| Shortness of breath               | X                      | X                                 |
| New persistent cough              | X                      | X                                 |
| Fever                             | X                      | X                                 |
| Difficulty sleeping               | X                      | X                                 |
| Tiredness                         | X                      | X                                 |
| Severe fatigue                    | X                      | X                                 |
| Numbness/tingling                 | X                      | X                                 |
| Muscle aches                      | X                      | X                                 |
| Red, itchy areas on the skin      | X                      | X                                 |
| Sudden swelling to face or lips   | X                      | X                                 |
| Purple sores/blisters on feet     | X                      | X                                 |
| Thrombosis                        |                        | X                                 |
| Confusion/brain fog/forgetfulness |                        | X                                 |
| Heart issues                      |                        | X                                 |

|                |   |
|----------------|---|
| Pain in joints | X |
| Weight loss    | X |
| Vision issues  | X |
| Hearing issues | X |
| Hair loss      | X |

### **Survey (Rounds 3–5)**

Survey questionnaires for all rounds of REACT-2 can be accessed [here](#). The key questions for self-reported COVID-19, symptoms and symptom duration in rounds 3–5 were:

#### **Before you took this antibody test, did you think you had had COVID-19?**

1. Yes, confirmed by a positive test (swab/\*PCR/antigen test) (A swab/PCR/antigen test is done by a nasal or throat swab and tests for current COVID-19 infection)
2. Yes, suspected by a doctor but not tested
3. Yes, my own suspicions
4. No

#### **How severe was your illness when you had/thought you had COVID-19?**

1. 1. No symptoms
2. 2. Mild symptoms – didn't affect my daily life
3. 3. Moderate symptoms – some effect on my daily life
4. 4. Severe symptoms – significant effect on my daily life

#### **When did your first symptoms start (as best as you can remember)?**

[WRITE IN DATE DAY/MONTH/YEAR]

#### **Which of the following symptoms were part of your COVID-19 illness?**

[LIST OF 29 SYMPTOMS WITH CHECKBOXES]

#### **Thinking about [EACH SYMPTOM SELECTED ABOVE] do you still have this symptom:**

1. Yes
2. No

#### **Thinking about [EACH SYMPTOM SELECTED ABOVE], how long did this symptom last for approximately? Please enter a value for either Days or Weeks. If you are unsure, please give an estimate.**

[WRITE IN DURATION]



**How severe was your illness when you had/thought you had COVID-19?**

1. No symptoms
2. Mild symptoms – didn't affect my daily life
3. Moderate symptoms – some effect on my daily life
4. Severe symptoms – significant effect on my daily life

**Survey (Round 6)**

The key questions for self-reported COVID-19, symptoms and symptom duration in rounds 3–5 were:

**Before you took this antibody test, did you think you had had COVID-19?**

5. Yes, confirmed by a positive test (swab/\*PCR/antigen test) (A swab/PCR/antigen test is done by a nasal or throat swab and tests for current COVID-19 infection)
6. Yes, suspected by a doctor but not tested
7. Yes, my own suspicions
8. No

**How severe was your illness when you had/thought you had COVID-19?**

5. 1. No symptoms
6. 2. Mild symptoms – didn't affect my daily life
7. 3. Moderate symptoms – some effect on my daily life
8. 4. Severe symptoms – significant effect on my daily life

**When did your first symptoms start (as best as you can remember)?**

[WRITE IN DATE DAY/MONTH/YEAR]

**Which of the following symptoms were part of your COVID-19 illness?**

[LIST OF 29 SYMPTOMS WITH CHECKBOXES]

**Some people who have COVID-19 have symptoms that last for more than four weeks. When you had/thought you had COVID-19, did your symptoms last for more than four weeks?**

1. Yes, and I still have symptoms
2. Yes, but I no longer have symptoms
3. No, the symptoms lasted for four weeks or less
4. No, never had any symptoms

5. Don't know – still have symptoms but not yet for four weeks

**Thinking of the symptoms that lasted for more than four weeks, which, if any, of the following did you have? Please select all the symptoms you had for more than four weeks, whether or not you saw a doctor.**

[LIST OF 30 SYMPTOMS WITH CHECKBOXES]

**Thinking about [EACH SYMPTOM SELECTED ABOVE], how long did this symptom last for approximately? If you still have this symptom, how long has it lasted for? If you are unsure, please give an estimate.**

1. Less than four weeks
2. Four weeks up to two months
3. Two months up to three months
4. Three months up to six months
5. More than six months
